1 **TypeTE: a tool to genotype mobile element insertions from whole**  
2 **genome resequencing data**

3

4 Clement Goubert<sup>1a</sup>, Jainy Thomas<sup>2a</sup>, Lindsay M. Payer<sup>3</sup>, Jeffrey M. Kidd<sup>4</sup>, Julie Feusier<sup>2</sup>,  
5 W. Scott Watkins<sup>2</sup>, Kathleen H. Burns<sup>3</sup>, Lynn B. Jorde<sup>2\*</sup> and Cedric Feschotte<sup>1\*</sup>

6

7 <sup>1</sup>Department of Molecular Biology and Genetics, 215 Tower Rd, Cornell University, Ithaca, New York  
8 14853, USA

9 <sup>2</sup>Department of Human Genetics, University of Utah School of Medicine, Salt Lake City, UT 84112, USA

10 <sup>3</sup>Department of Pathology, Johns Hopkins University School of Medicine, Baltimore, MD 21205, USA

11 <sup>4</sup>Department of Human Genetics, University of Michigan Medical School, Ann Arbor, MI 48109, USA

12 Department of Computational Medicine and Bioinformatics, University of Michigan Medical School, Ann  
13 Arbor, MI 48109, USA

14

15 \*To whom correspondence should be addressed: Tel: (+1) 607 255-8793; Fax: +1; Email:

16 [cf458@cornell.edu](mailto:cf458@cornell.edu) Correspondence may also be addressed to Tel: (+1)801-581-4566; Fax: (+1); Email:

17 [lbj@genetics.utah.edu](mailto:lbj@genetics.utah.edu)

18 \*Co-senior authors

19 <sup>a</sup>The authors wish it to be known that, in their opinion, the first 2 authors should be regarded as joint first  
20 authors

21

22

23

24

25

26

27

28

29

30 **ABSTRACT**

31

32

33 *Alu* retrotransposons account for more than 10% of the human genome, and insertions

34 of these elements create structural variants segregating in human populations. Such

35 polymorphic *Alu* are powerful markers to understand population structure, and they

36 represent variants that can greatly impact genome function, including gene expression.

37 Accurate genotyping of *Alu* and other mobile elements has been challenging. Indeed,

38 we found that *Alu* genotypes previously called for the 1000 Genomes Project are

39 sometimes erroneous, which poses significant problems for phasing these insertions

40 with other variants that comprise the haplotype. To ameliorate this issue, we introduce a

41 new pipeline -- TypeTE -- which genotypes *Alu* insertions from whole-genome

42 sequencing data. Starting from a list of polymorphic *Alus*, TypeTE identifies the

43 hallmarks (poly-A tail and target site duplication) and orientation of *Alu* insertions using

44 local re-assembly to reconstruct presence and absence alleles. Genotype likelihoods

45 are then computed after re-mapping sequencing reads to the reconstructed alleles.

46 Using a 'gold standard' set of PCR-based genotyping of >200 loci, we show that

47 TypeTE improves genotype accuracy from 83% to 92% in the 1000 Genomes dataset.

48 TypeTE can be readily adapted to other retrotransposon families and brings a valuable

49 toolbox addition for population genomics.

50

51

52

53

## 54 INTRODUCTION

55

56 Mobile element insertions (MEIs) are ubiquitous and are major contributors to genomic  
57 variation between and within species (Kidwell and Lisch 1997; Sudmant et al. 2015;  
58 Underwood, Henderson, and Martienssen 2017). Active ME families continuously  
59 generate new MEIs which segregate among individuals. Individual MEI generate  
60 structural variants (SV) between genomes (typically insertions) and can lead to complex  
61 chromosomal rearrangements through non-homologous recombination between copies  
62 (Jurka et al. 2004; Song and Boissinot 2007; Xing et al. 2009; Thomas, Perron, and  
63 Feschotte 2018). Both processes represent a substantial source of genomic instability,  
64 which has been implicated in more than 100 human genetic diseases (Hancks and  
65 Kazazian 2016) , and they are also fodder for the emergence of adaptive genetic  
66 novelties (Oliver, McComb, and Greene 2013; Chuong, Elde, and Feschotte 2017;  
67 Wallace et al. 2018; Horváth, Merenciano, and González 2017; Jangam, Feschotte, and  
68 Betrán 2017)(Oliver et al. 2013; Chuong et al. 2017; Horváth et al. 2017; Jangam et al.  
69 2017).

70

71 In humans, recently mobilized transposable elements (TEs) include members of the  
72 LINE-1, *Alu*, SVA, and a few human endogenous retroviruses (HERVs) families.  
73 Together these elements make up to >30% of the human genome, but relatively few  
74 remain polymorphic, *i.e.* being either present or absent between two genomes (Mills et  
75 al. 2007; Hancks and Kazazian 2012). Such polymorphic MEIs (pMEIs) account for  
76 hundreds to thousands of loci per individual (Stewart et al. 2011; Hancks and Kazazian

77 2012; Sudmant et al. 2015). The extent of pMEIs segregating in the human population  
78 is yet to be determined, but *Alu* is known to be the most common source of human  
79 pMEIs. Thus far, a little less than 20,000 *Alu* copies have been identified as  
80 segregating among 2,504 humans sampled as part of the 1000 Genomes Project  
81 (Sudmant et al, 2015; 1000 GP, Gardner et al., 2017).

82

83 *Alu* elements are powerful markers for genetic and evolutionary studies of human  
84 populations. As non-autonomous retrotransposons, *Alus* amplify through a copy-and-  
85 paste mechanism utilizing LINE-1 machinery (Dewannieux, Esnault, and Heidmann  
86 2003) and are inherently incapable of precise excision, providing identical-by-descent  
87 loci virtually free of homoplasy (Doronina et al. 2019). Accordingly, *Alu* have been  
88 shown to effectively track human population history (Watkins et al. 2003; Jurka, Bao,  
89 and Kojima 2011; Stewart et al. 2011; Rishishwar, Tellez Villa, and Jordan 2015). Like  
90 most MEIs, *Alu* insertions in humans are usually thought of as neutral variants that  
91 achieve fixation in the population through genetic drift (Boissinot et al. 2006; Cordaux et  
92 al. 2006). Nevertheless, more than 70 *de novo Alu* insertions are known to cause  
93 genetic diseases (Hancks and Kazazian 2016), including neurological disorders (Larsen  
94 et al. 2018; Hueso et al., n.d.). Furthermore, polymorphic *Alu* insertions have been  
95 identified as candidate causative variants in common polygenic diseases (Payer et al.  
96 2017), and a handful have been shown to alter mRNA splicing (Payer et al. 2019).

97 Finally, worldwide reference pMEI datasets such as those produced by 1000 GP  
98 (Sudmant et al. 2015) can be used in conjunction with gene expression data (e.g. RNA-  
99 seq) to identify loci associated with changes in gene expression (S. Wang et al. 2016).

100 Together these studies suggest that pMEIs, and *Alus* in particular, play an important,  
101 yet still underappreciated role in human phenotypic variation.

102

103 Recognizing the abundance and biological significance of MEIs, a growing number of  
104 software packages have been developed in the past few years to detect and map  
105 pMEIs in whole-genome resequencing (WGS) data relative to a reference genome  
106 (Goerner-Potvin and Bourque 2018). For studies of human pMEIs, Tea (Lee et al.  
107 2012), Retroseq (Keane, Wong, and Adams 2013), Mobster (Thung et al. 2014), Tlex2  
108 (Fiston-Lavier et al. 2015), RelocaTE2 (J. Chen et al. 2017), STEAK (Santander et al.  
109 2017), MELT (Gardner et al. 2017), TranSurVeyor (Rajaby and Sung 2018), polyDetect  
110 (Jordan et al. 2018), and ERVcaller (X. Chen and Li 2019) are among the most recent  
111 software tools available. The algorithmic refinement dedicated to accurately detecting  
112 pMEIs, and *Alus* in particular, in WGS data has led to an increase of the quality of the  
113 calls. Notably, the accurate detection of the presence or absence of a specific *Alu* at a  
114 precise breakpoint has improved substantially in recent years (Rishishwar, Mariño-  
115 Ramírez, and King Jordan 2016; Gardner et al. 2017; X. Chen and Li 2019).

116

117 Although the discovery of *Alu* and other pMEI alleles is generally benchmarked  
118 extensively when these methods are evaluated, far less attention has been paid to  
119 individual genotyping, *i.e.* determining whether the insertion is a homozygote or  
120 heterozygote for each individual locus. Genotyping accuracy is critical for phasing  
121 insertion polymorphisms with single nucleotide polymorphisms (SNPs) and relating  
122 insertions with expression quantitative trait loci (eQTL) and disease-risk loci identified by

123 genome wide association studies (GWAS). Similarly, accurate genotypes are necessary  
124 to infer how the effects of drift and selection influence allele frequencies. However,  
125 genotyping accuracy of pMEI released with the 1000 GP dataset has only been  
126 estimated using 250 bp Illumina reads (accuracy estimated to 98%) (Sudmant et al.,  
127 2015) . To our knowledge, only three pipelines, MELT (Gardner et al. 2017), polyDetect  
128 (Jordan et al. 2018), and ERVcaller (X. Chen and Li 2019) are maintained as tools that  
129 directly allow genotyping for non-reference pMEIs. However, MELT is the only one  
130 offering the option to directly genotype reference pMEIs (*i.e.* polymorphic elements that  
131 are annotated in the reference genome but still segregating in the population). None of  
132 these tools have been subject to a comprehensive evaluation of their genotyping  
133 performance. Given the ever-growing number of resequencing efforts, there is a  
134 pressing need to develop highly accurate genotyping tools to complement the diverse  
135 methods already available to detect the presence or absence of pMEI.

136

137 To address these issues, we have developed a new bioinformatics pipeline, TypeTE,  
138 which improves the genotyping of pMEIs located by other tools using whole genome  
139 resequencing data. Our method is based on the accurate recreation of both the  
140 presence and absence of pMEI alleles before the remapping of reads for genotyping.  
141 We benchmarked TypeTE with both low- and high-coverage data [(1000 GP phase 3  
142 (Sudmant et al. 2015) and Simons Genome Diversity Project, (SGDP) (Mallick et al.  
143 2016) respectively] and show, based on a collection of more than 200 PCR-based  
144 genotyping assays, that our method significantly improves genotype quality. In addition,  
145 we applied TypeTE to all polymorphic *Alu* insertions discovered in 445 human samples

146 both present in the 1000 GP phase 3 (low-coverage WGS) and the Genetic European  
147 Variation in Disease Consortium (GEUVADIS; RNA sequencing) (Lappalainen et al.  
148 2013). We thus provide a new high-quality genomic resource dedicated to the functional  
149 and evolutionary analysis of polymorphic *Alu* insertions.

150

## 151 MATERIAL AND METHODS

152

### 153 Pipeline implementation

154 *Non-reference MEI*. TypeTE-*non-reference* is designed to genotype insertions not found  
155 in the reference genome (Figure 1A, Supplementary Figure S1). Based on the  
156 information provided in a vcf file (such as produced by MELT), the location and  
157 orientation of each *Alu* insertion are first collected. For each breakpoint, reads that are  
158 mapped in a window of 500 bp (250 bp upstream and downstream of the breakpoint)  
159 are extracted. The mates of discordant reads (mapping somewhere else in the genome)  
160 are also extracted from the BAM file of each individual. The reads from all individuals for  
161 each locus are then combined, and a local *de-novo* assembly of all the reads is  
162 attempted using SPAdes v3.11.1 (Bankevich et al. 2012). Minia (v2.0.7) (Chikhi and  
163 Rizk 2013) is used as an alternate assembler when SPAdes failed to generate an  
164 assembly of the sequences ('scaffolds.fasta'). The genomic locations where mates of  
165 discordant reads are mapped are identified and intersected with the respective  
166 RepeatMasker track (we used the coordinates version hg19 for 1000 GP data and hg38  
167 for the SGDP data; Repbase version 20140131). Using a majority rule, the most likely  
168 *Alu* subfamily consensus for the copy inserted at that locus is identified. To verify  
169 orientation and identify target site duplications (TSDs), homology-based searches are  
170 performed. First, the identified *Alu* consensus is searched with blastn (v. 2.6.0+) against  
171 the assembled contigs. Then, a second blastn is performed using the genome reference  
172 sequence (500 bps window) against the assembled contigs. The contig with the highest  
173 score from the query *Alu* and the reference sequence is selected and searched for  
174 target site duplications flanking the MEI. To identify the strand of the MEI, the sequence



175 flanking the insertion in the contig is further compared with the reference sequence. For  
176 each MEI, the two alleles are reconstructed as follows: a new window of +/- 500bp is  
177 extracted upstream and downstream of the breakpoint predicted by MELT. This  
178 represents the “absence” allele. To recreate the “presence” allele, TypeTE first removes  
179 the predicted TSDs from the extracted reference sequence and inserts the fully  
180 assembled MEI with its two TSDs in the correct orientation. If the assembly fails to  
181 generate a complete sequence of the MEI with flanking TSDs, the TSD predicted by the  
182 TE detection program (in our case MELT) is duplicated and placed at the 5’ and 3’ end  
183 of the consensus MEI in the composite allele.

184

185 **<FIGURE 1>**

186

187 *Reference TE.* TypeTE-reference determines genotypes of *Alus* in the reference  
188 genome that are polymorphic in other individuals (Figure 1B, Supplementary Figure S2).  
189 In this case, no reads are extracted from the original alignments to reconstruct the  
190 alternate allele. However, the exact coordinates and TSDs of each MEI in the reference  
191 genome are reassessed as follows: the breakpoints identified from MELT for the  
192 location of the reference TE are further refined using the corresponding RepeatMasker  
193 annotation track to identify the exact location and orientation of each TE inserted in the  
194 reference genome. At first, the longest reference *Alu* elements that are within +/-50 bps  
195 of the predicted MELT breakpoints are extracted. If none is found within that boundary,  
196 *Alus* within +/-110 bps of the predicted breakpoints are collected. However, we did not  
197 find any difference in the number of elements identified after increasing the boundary up

198 to 200bps. The flanking sequence of the TE sequence is also extracted and TSDs and  
199 their coordinates are identified whenever possible. Then, based on these new  
200 coordinates, a region of +/- 500 bps upstream and downstream of the 5' and 3' end of  
201 the MEI is extracted from the reference genome. This constitutes the "presence" allele.  
202 The "absence" allele is defined by removing the TE sequence and one TSD from the  
203 reference genome.

204

205 *Genotyping.* TypeTE automatically generates input files and parallelizes the method  
206 developed by Wildschutte et al. (Wildschutte et al. 2015), called *insertion-genotype*, to  
207 genotype each *Alu* insertion in every individual. Briefly, read-pairs with at least one read  
208 mapping to the target locus are extracted and mapped against the reconstructed  
209 insertion and empty site alleles using bwa (v. 0.7.16a) (H. Li and Durbin 2009). The  
210 number of reads that align to each allele, and their associated mapping quality values  
211 are tabulated and likelihoods for the three possible genotype states are calculated (H. Li  
212 2011). Reads that map equally well to the empty and insertion alleles are assigned a  
213 mapping quality of 0 by bwa (H. Li and Durbin 2009) and do not contribute to this  
214 calculation. Additionally, read pairs are required to partially align to the repeat sequence  
215 and pairs that align entirely within the target repeat sequence are ignored, since these  
216 reads may not be specific to the targeted locus. By default, the genotype with the  
217 highest likelihood is chosen, but the resulting likelihoods may optionally be used as  
218 inputs to downstream programs which estimate genotypes based on patterns across  
219 multiple samples and sites. After genotyping, individual per-sample VCFs are  
220 concatenated.

221

## 222 **Evaluation of the 1000 GP genotypes quality and TypeTE performance**

223 *Genotype calling.* In order to evaluate the quality of the *Alu* genotype calls available in  
224 the 1000 GP phase 3 structural variants (SV) dataset ([Sudmant et al. 2015], average  
225 depth of coverage 7.4X), we gathered the genotypes available for both non-reference  
226 (indicated by “<INS:ME:ALU>” in the available VCF file) and reference (tagged with  
227 “SV\_TYPE=DEL\_ALU”). We ran TypeTE-reference and TypeTE-non-reference on the  
228 same loci as well as MELT-discovery (non-reference) and MELT-deletion (reference)  
229 using its version 2.1.4 (referred to as MELT2 for the remainder of the manuscript) in  
230 order to take into account, the most recent changes added to its genotyping module.  
231 Additionally, we tested the performances of TypeTE with samples from the SGDP  
232 ([Mallick et al. 2016](#)), which has higher coverage (average 42X).

233

234 In the 1000 GP data, we ran TypeTE and MELT2 on 445 CEU, TSI, GBR, FIN and YRI  
235 individuals, also present in the Geuvadis dataset (RNA-seq) ([Lappalainen et al. 2013](#)).  
236 In the 1000 GP dataset released by Sudmant et al. ([Sudmant et al. 2015](#)), *Alu*  
237 genotypes were produced by MELT (first version) for non-reference insertions.  
238 However, polymorphic reference *Alu* insertions were first discovered along with other  
239 genomic deletions with a set of SV detection tools (BreakDancer, Delly, CNVnator,  
240 GenomeSTRIP, Variation-Hunter, SSF and Pindel), then genotyped with the same  
241 algorithm as any other SV ([Sudmant et al. 2015](#)). Because the sample size we used  
242 was smaller than the original one ( $n = 445$  vs  $n = 2504$ ), MELT2 did not recover all loci  
243 genotyped by the 1000 GP and TypeTE. Also, probably because of changes in the

244 newer version, some Alu breakpoints were slightly different between the Sudmant et al.  
245 ([Sudmant et al. 2015](#)) dataset and the MELT2 output. Thus, in order to reconcile and  
246 compare the three datasets, bedtools intersect (v.1.5) (Quinlan et al. 2010) was used  
247 with a window of +/- 30bp around each original 1000 GP Alu breakpoint. Finally, the  
248 predicted genotypes were compared to PCR assays of 108 non-reference and 43  
249 reference loci in 42 individuals from the CEU population (see next section).

250 For the SGDP data, reference and non-reference polymorphic *Alu* insertions were  
251 called using MELT2 in 14 publicly available individuals from the South Asian population  
252 for which we had access to DNA. The genotypes of the loci discovered were then  
253 determined using TypeTE and compared to 9 non-reference and 67 reference loci  
254 previously genotyped by PCR in these 14 samples (Watkins et al. 2003).

255

256 *PCR typing in a subset of 1KGP and SGDP dataset.* Non-reference (108) and reference  
257 (43) *Alu* loci identified in 1000 GP were tested in a 30-trio reference panel of CEPH  
258 CEU individuals (42 individuals were evaluated by PCR and sequenced in 1000 GP)  
259 (HAPMAPPT01, Coriell Institute for Medical Research). Primers flanking the *Alu*  
260 insertion site were selected using Primer3 (Untergasser et al. 2012). PCR amplifications  
261 were performed using OneTaq Hot Start Quick-Load 2x Master Mix (New England  
262 BioLabs) using 3-step PCR (initial denaturation: 94°C, 15", (94°C, 15"; 57°C, 15"; 68°C,  
263 30") for 30 cycles; final extension 68°C, 5'). Sequences for 20 new primer pairs are  
264 available in Table S1; the remainder are available in (Payer et al. 2017). Accuracy was  
265 evaluated by replication in duplicate samples and by evaluating the number of  
266 Mendelian errors in related individuals. Non-reference (9) and reference (67) *Alu* loci

267 were previously genotyped by PCR in 14 South Asian samples present in the SGDP  
268 dataset (Watkins et al. 2003). Primers around each *Alu* insertion were selected using  
269 Primer3 (Untergasser et al. 2012). PCR amplification was performed using three-step  
270 PCR (initial denaturation: 94°C, 3'; (94°C, 15"; 60°C, 15"; 72°C, 30") for 30 cycles; final  
271 extension 72°C, 5') in 1X PCR buffer (10mM Tris, pH 8.3, 50mM KCl, 1.5 mM MgCl<sub>2</sub>)  
272 with 200 μM dNTPs, 10 pmol each primer, and 1U Taq polymerase. Annealing  
273 temperature was adjusted for each primer set. DMSO (5-10%) was used to improve  
274 amplification for some loci.

275

### 276 **Effect of genotype corrections on the *Alu* insertion discovery**

277 In some cases, new genotyping changed the presence/absence status of an *Alu*  
278 insertion for a given genome. We define a false positive (FP) as a case in which an *Alu*  
279 copy is called present, either homozygote or heterozygote in one sample, while the  
280 PCR reported it absent. A false negative (FN) is recorded when an *Alu* is called absent  
281 (homozygote absent ) while it is called as either homozygote present or heterozygous  
282 by PCR. True positive (TP) and true negative (TN) are the same calls  
283 (presence/absence), respectively, being validated by PCR. For each dataset and  
284 method, we calculated the sensitivity (ability of the method to discover a MEI:  
285  $TP/(TP+FN)$ ), the precision (or positive predictive value:  $TP/(TP+FP)$ ) as well as the F1  
286 score as described by Rishishwar et al (Rishishwar, Mariño-Ramírez, and King Jordan  
287 2016), which corresponds to the harmonic mean of sensitivity and precision and  
288 summarizes the overall performance of each method.

289

## 290 **Estimation of mappability scores**

291 The mappability scores are downloaded for the GRCh37/hg19 version of reference  
292 assembly for 100mers  
293 (<ftp://hgdownload.soe.ucsc.edu/gbdb/hg19/bbi/wgEncodeCrgMapabilityAlign100mer.bw>  
294 ). The downloaded file is processed (Kent et al. 2010) and is converted to bed format  
295 (Neph et al. 2012). These data are stored in an indexed mysql table. The mappability  
296 scores for genomic regions in the flanking region (+/- 250bps) of the predicted *Alu*  
297 breakpoint for non-reference insertions and flanking region (+/- 250bps) of the reference  
298 *Alu* insertions are extracted from the table, and the mean of the mappability scores is  
299 recorded in a dedicated table and is provided with the output files.

300

## 301 **Calculation of local read depth**

302 The average read depth at genomic regions in the flanking region (+/- 250bps) of the  
303 predicted *Alu* breakpoint for non-reference insertions and flanking region (+/- 250bps) of  
304 the reference *Alu* insertions is calculated using samtools (Version: 1.4.1). Only reads  
305 with a mapping quality of 20 or more (mapped with > 99% probability) and bases with a  
306 quality of 20 or more (base call accuracy of > 99%) are counted.

307

## 308 **Inbreeding Coefficient (*F<sub>is</sub>*) estimates.**

309 In order to assess how genotype quality affects common population genetics summary  
310 statistics, we computed the per locus inbreeding coefficient (*F<sub>is</sub>*) for the loci assayed by  
311 PCR.  $F_{is}$  is a common metric used in population genetics to assess the excess ( $F_{is} < 0$ )

312 or the depletion ( $F_{is} > 0$ ) in heterozygotes relative to the expected genotypes proportion  
313 at Hardy-Weinberg equilibrium. Allele frequencies were calculated using the genotypes  
314 produced by each method (1000 GP, MELT2, TypeTE and PCR) as follows:

315 
$$F_{is} = \frac{H_{exp} - H_{obs}}{H_{exp}}$$

316 with  $H_{exp} = 2pq$ ,  $p$  = presence allele insertion frequency,  $q = (1-p)$   $H_{obs}$  is the observed  
317 number of heterozygotes.

318

319 All statistical analyses were carried out with R version 3.5.1 (R Core Team 2018).

320

## 321 **RESULTS**

322

### 323 **Concordance of the 1000 GP dataset genotypes with PCR assays**

324 *Alu* genotype predictions in the 1000 GP phase 3 release (Sudmant et al. 2015) were  
325 called using MELTv1.0 (first version) for non-reference loci and a combination of SV  
326 tools (Sudmant et al. 2015) for reference insertions. To assess their accuracy, we  
327 compared them to an assembled collection of 108 non-reference and 43 reference loci  
328 genotyped by PCR (Figure 2A and Table 1) in 42 individuals (see methods). To ensure  
329 accuracy in genotyping validations, PCR assays were performed using all (30) trios of  
330 the CEPH CEU, and in all cases, no Mendelian errors in the transmission of alleles from  
331 parents to offspring were seen (see methods). Presence of both “empty” and “filled”  
332 alleles (with and without *Alu*) were confirmed by the presence of bands of expected size  
333 in the agarose gel electrophoresis and in most cases with Sanger sequencing. Upon  
334 comparing the genotype predictions to PCR assays, we found that the 1000 GP phase

335 3 release had an overall concordance rate with the PCR (total number of prediction  
336 identical to the PCR generated genotypes/ total number of predictions) of 83.31%  
337 (3649/4380) for non-reference *Alu* insertions and 80.72% (1248/1590) for reference  
338 insertions.

339

340 <FIGURE 2>

341

### 342 **TypeTE pipeline overview**

343 In order to improve the quality of *Alu* genotyping by short read sequencing analysis, we  
344 developed TypeTE which allows the re-genotyping of both reference and non-reference  
345 *Alu* insertions. The pipeline is divided into two main modules: the *non-reference* module  
346 genotypes *Alu* insertions absent from the reference genome, while the *reference*  
347 module genotypes *Alu* insertions present in the reference genome. Details about the  
348 implementation of each module are given in the Material and Methods section (Figure  
349 1, Supplemental Figure S1 and Supplemental Figure S2). The basic principle of TypeTE  
350 is to recreate the most accurate sequences for the two alleles of each insertion  
351 (presence and absence). TypeTE currently uses a VCF file such as produced by a TE  
352 discovery tool such as MELT to locate each individual TE insertion. The pipeline then  
353 performs an independent analysis of each predicted locus and collects the information  
354 regarding the insertion. After allele reconstruction (see Material and Methods), the  
355 individual reads mapping to each insertion locus are extracted from the original  
356 alignment file (bam) and mapped against the reconstructed alleles for genotyping using  
357 an automated and parallelized version of the method developed by Wildschutte et al.



358 (2015). A new VCF file with the corrected genotypes and genotypes likelihoods is then  
359 produced.

360

### 361 **TypeTE performances**

362 In order to assess the accuracy of the predictions made by TypeTE, we ran the pipeline  
363 on a subset of 445 individuals of European and African ancestry included in the 1000  
364 GP dataset (see Material and Methods). These samples were selected because they  
365 are both represented in the 1000 GP (WGS) and GEUVADIS (RNA-seq) datasets,  
366 allowing functional analyses of pMEIs. We also compared the performance of TypeTE  
367 with a recent version of MELT (version 2.1.4, abbreviated as MELT2) using the  
368 packages MELT-discovery and MELT-deletion on the same sample. TypeTE and  
369 MELT2 genotypes were then compared to 108 non-reference and 43 reference insertion  
370 for which we have collected or generated PCR genotypes. With non-reference  
371 insertions, MELT2 shows increased concordance with the PCR compared to the original  
372 1000 GP calls, with 87.95% (vs 83.31%; +131/4298  
373 accurate genotypes) of the predicted genotypes matching the experimental results.  
374 TypeTE further increases the concordance of the genotype prediction, achieving a rate  
375 of 92.14% (+325/4313  
376 accurate genotypes compared to original 1000 GP release). For reference insertions,  
377 MELT2 had a lower concordance than the original 1000 GP predictions, with only 71%  
378 (vs. 80.72%; -374/1504 genotypes) of the genotypes matching the PCR results, while  
379 TypeTE achieved 91.56% concordance (+ 141/1575 genotypes). Note that the total

380 number of genotypes considered correspond to the total number of predictions available

---

1000 GP

---

381 and doesn't take into account here the missing genotypes.

382 We further tested the genotyping performance of MELT2 and TypeTE with the SGDP  
383 (Mallick et al. 2016) data, which benefits from a higher depth of coverage than the 1000  
384 GP data (42x vs 7.4x). We tested the concordance of the predicted genotypes with 67  
385 reference and 9 non-reference *Alu* loci in 14 individuals previously genotyped by PCR  
386 (Watkins et al. 2003). MELT2 has a concordance rate of 70.13% for reference loci while  
387 TypeTE matches the PCR results for 91.01% of the predicted genotypes (+181 correct  
388 genotypes; Figure 3 and Table 1). Finally, for the 9 non-reference loci that were  
389 experimentally genotyped, the concordance rate is 78.57% for MELT2 and 94.44% for  
390 TypeTE (+ 20 correct genotypes).

391

392 **<FIGURE3>**

393

394 In order to analyze in detail, the genotyping performances of each method, we  
395 calculated the concordance rate by genotype category (0 or (0/0): homozygote absent,  
396 1 or (0/1): heterozygote, 2 or (1/1): homozygote present) corresponding to the percent  
397 of correct genotypes in one category to the total number of calls for this category (Table  
398 1). Additionally, we report the percentage of unascertained loci (NA genotypes) for each  
399 method.

400

401

402

|            | non-reference insertions (n=108x42) |         |         |       |         | reference insertions (n=43x42) |         |         |       |               |
|------------|-------------------------------------|---------|---------|-------|---------|--------------------------------|---------|---------|-------|---------------|
|            | hom ref                             |         | hom alt |       | overall | hom ref                        |         | hom alt |       | overall       |
|            | (0)                                 | het (1) | (2)     | NAs   |         | (2)                            | het (1) | (0)     | NAs   |               |
| 1000 GP    | 98.92%                              | 98.28%  | 23.49%  | -*    | 83.31%  | 97.71%                         | 90.00%  | 41.84%  | -*    | <b>80.72%</b> |
| MELT 2.1.4 | 99.02%                              | 92.27%  | 68.01%  | 1.90% | 87.95%  | 98.63%                         | 37.97%  | 26.62%  | 5.37% | <b>71.00%</b> |
| TypeTE     | 98.44%                              | 89.28%  | 93.61%  | 1.54% | 92.14%  | 91.46%                         | 84.54%  | 87.82%  | 1.04% | <b>91.56%</b> |

  

|            | SGDP                              |        |         |                                |        |
|------------|-----------------------------------|--------|---------|--------------------------------|--------|
|            | non-reference insertions (n=9x14) |        |         | reference insertions (n=67x14) |        |
|            |                                   |        |         |                                |        |
| 1000 GP    | -                                 | -      | -       | -                              | -      |
| MELT 2.1.4 | 92.31%                            | 94.87% | 9.09%   | 0.00%                          | 79.57% |
| TypeTE     | 92.31%                            | 94.87% | 100.00% | 0.00%                          | 94.44% |

NA: Not Applicable as no genotypes reported

\*no NA genotype has been reported in the Sudmant et al. (2015) dataset

403 Table 1. Genotype prediction accuracy (%) for each category of insertions when  
 404 compared with PCR generated genotypes  
 405

406 We then investigated how the concordance between predicted and PCR genotypes is  
 407 distributed across loci and individuals by calculating the average concordance rate at  
 408 each locus (total number of correct genotypes at a locus / total number of individuals  
 409 with a predicted genotype). Regardless of the genotype category (reference / non-  
 410 reference), TypeTE has a higher average concordance rate per locus, as well as lower  
 411 variance for this value, than the other methods (Figure 4). The greatest improvement  
 412 was when the genotypes of reference insertions were compared to MELT2, where the  
 413 concordance rate of TypeTE is always significantly higher (Tukey's HSD,  $P < 0.05$ ).

414

415 <FIGURE 4>

416

417 For each locus assayed by PCR in the 1000 GP dataset, we also examined whether the  
 418 mappability and local read coverage affect genotyping predictions for TypeTE. We do  
 419 not find a significant correlation between genotype concordance and the mappability  
 420 score (0.1 - 1) computed in a 500-bp window around the MEI breakpoints

421 (Supplementary Figure S3. Pearson's product-moment correlation,  $r = 0.20$ ,  $P = 0.281$   
422 for non-reference loci and  $r = 0.13$ ,  $P = 0.414$  for reference loci). We also found that the  
423 average depth of coverage for a given locus (4.69 X – 10.01 X) is not correlated to  
424 genotyping concordance for both reference ( $r = 0.12$ ,  $P = 0.4538$ ) and non-reference  
425 insertions ( $r = -0.01$ ,  $P = 0.957$ ) (Supplementary Figure S4). We conclude that at least  
426 for the loci tested by PCR, the level of repetitiveness of the flanking sequence of  
427 individual *Alu* insertions and the local read depth do not appear to influence the  
428 genotyping performance of TypeTE.

429

430

#### 431 **Effect of genotype corrections on variant discovery**

432 Different methods can assign different genotypes for some loci due to the inherent  
433 differences in their approach or due to locus specific features. For example, a  
434 heterozygous locus for the presence of *Alu* can be genotyped either as homozygous  
435 presence or absence by different methods. We first converted the genotypes into  
436 presence/absence calls in order to assess sensitivity, precision (positive predictive  
437 value), and the overall detection accuracy, summarized by the F1 score (harmonic  
438 mean of sensitivity and precision, see Material and Methods) for each method  
439 considering PCR results as true genotypes. TypeTE received the highest F1 score in  
440 each dataset (1000 GP or SGDP) and for both types of insertion (reference or non-  
441 reference) (Fig 5). The small number of loci tested for the SGDP-non-reference dataset  
442 ( $n = 9$ ) did not allow us to find significant differences between the methods; however, we  
443 show that the increased F1 score of TypeTE with the 1000 GP-non-reference loci is due

444 to a significant increase of the sensitivity compared to the other methods. Interestingly,  
445 the higher F1 score of TypeTE with reference insertions (both for the 1000 GP and  
446 SGDP datasets) is, in these cases, due to significantly higher precision (TP/(TP+FP)).

447

448 **<FIGURE 5>**

449

### 450 **Influence of re-genotyping on population genetics statistics**

451 To illustrate the importance of accurately genotyping of *Alus*, we calculated the  
452 population-wise inbreeding coefficient ( $F_{is}$ ) for each locus in 42 individuals of the CEU  
453 cohort (1000 GP) and 14 individuals of the South Asian cohort (SGDP). Compared to  
454 the original 1000 GP and MELT2 genotypes, the  $F_{is}$  values calculated with TypeTE  
455 genotypes are concordant with the ones based on PCR genotypes. These results are  
456 even more striking when only reference loci are considered: while TypeTE and PCR  
457 estimates of  $F_{is}$  are centered at 0, MELT2 and 1000 GP genotypes suggest a clear  
458 deviation of most loci from Hardy-Weinberg equilibrium (Figure 6). We note that  
459 estimates of the  $F_{is}$  are more variable using the SGDP data, which can be explained by  
460 its smaller sample size and a higher population subdivision (e.g. castes) than the 1000  
461 GP dataset.

462

463 **<FIGURE 6>**

464

### 465 **Influence of the dataset quality on genotype prediction**

466

467 To discover factors specific to each dataset that influence genotype prediction, we  
468 compared the results obtained in the 1000 GP dataset (average depth of 7.4 X) with the  
469 results from analysis of the SGDP (average depth of 42X) to the respective PCR  
470 genotypes. The provenance of the dataset does not influence the variant discovery  
471 abilities of MELT2 and TypeTE (Supplementary Figure S5). However, we observe that  
472 the percentage of unascertained loci differs between the 1000 GP and SGDP datasets.  
473 About 1% to 5.4% of genotypes are not ascertained by either MELT2 and TypeTE in the  
474 1000 GP dataset, probably due to low coverage. Conversely, all SGDP loci are called in  
475 every individual for the SGDP dataset (Table 1).

476

## 477 **DISCUSSION**

478

479 The purpose of TypeTE is to provide automatic and reliable genotyping of pMEIs,  
480 especially *Alus* from short read, whole genome or targeted interval sequencing. To our  
481 knowledge, MELT (Gardner et al. 2017) is the only tool with continued support and  
482 documentation that allows direct genotyping of both reference and non-reference pMEI.  
483 While its performance for variant discovery has made it a popular tool for pMEI  
484 mapping, to our knowledge its performance at genotyping has never been  
485 comprehensively tested. Moreover, there was no formal testing of the genotype quality  
486 concerning pMEI reported in the Phase 3 release of the 1000 GP. Thus, we thoroughly  
487 tested the *Alu* genotype predictions made for the 1000 GP, a recent version of MELT (v.  
488 2.1.4), and TypeTE by assembling the results of more than 200 locus-specific PCR  
489 genotyping assays.

490  
491 Combining reference and non-reference pMEI, our analysis indicates that 82% of the  
492 genotypes reported by the 1000 GP are consistent with the PCR assays which we  
493 consider the ‘gold standard’ and wherein accuracy was evaluated by comparing  
494 duplicate samples and verifying the absence of Mendelian errors in related individuals.  
495 This estimate of genotyping accuracy is much lower than a previous estimate of 98%  
496 based on long (250bp) Illumina reads (Sudmant et al. 2015). Genotypes reported by the  
497 1000 GP were estimated using the first version of MELT for non-reference loci, but  
498 genotyping methods developed for other structural variation (indels, inversions, etc.)  
499 were used for reference insertions. While MELT2 appears to offer a noticeable  
500 improvement over its first version for genotyping non-reference pMEI, its overall  
501 genotyping performance is diminished when applied to reference loci, with genotyping  
502 errors reaching more than 20% in based on our PCR assays. For both categories of  
503 loci, most errors are caused by the underestimation of homozygous genotypes carrying  
504 the alternative allele relative to the reference genome (Table 1). We note that for non-  
505 reference insertions, MELT’s genotyping algorithm benefited from improvements  
506 deployed in the version tested (v2.1.4) compared to its original release, in particular to  
507 detect homozygous insertion (1/1). However, this increased sensitivity to detect pMEI  
508 alleles from read alignments seems to be accompanied by a reduced power to detect  
509 “absence” alleles for reference insertions (MELT-deletion module). Such errors are  
510 consequential for population genetics analysis because they lead to inaccurate  
511 estimation of population genetics parameters. For example, calculation of the  
512 inbreeding coefficient ( $F_{IS}$ ) shows that the original release of the 1000 GP genotypes

513 was overestimating heterozygotes, leading to negative and likely inaccurate values of  
514  $F_{is}$  (Figure 6). Genotypes obtained with MELT2 improve these estimates for non-  
515 reference insertions, but the results appear less accurate when computed from a small  
516 sample and they are more inaccurate for reference insertions. These issues underscore  
517 the need for a tool dedicated to the genotyping of pMEI.

518

519 Toward this goal we developed TypeTE and applied it to genotype both reference and  
520 non-reference *Alu* insertions. Our benchmarking data show that TypeTE has an  
521 average concordance rate of 91% or greater with PCR-based genotyping. Importantly,  
522 TypeTE maintains a genotyping accuracy greater than 84% under all genotyping  
523 scenarios. While TypeTE performs better than MELT v1 (1000 GP) and MELT2 for non-  
524 reference insertions, the most significant improvement is for reference insertions. In  
525 particular, the genotypes predicted by 1000 GP and MELT2 never reached more than  
526 41.8% concordance with the experimental results when the PCR called a homozygote  
527 absence (0/0); by contrast, TypeTE predicted these genotypes with more than 87%  
528 concordance in the two datasets tested (1000 GP and SGDP). Consequently,  
529 calculation of  $F_{is}$  based on TypeTE genotypes shows better concordance with that  
530 based on PCR-derived genotypes, and fits the neutral expectation as we observe no  
531 deviation from Hardy-Weinberg equilibrium for a single human population (Hosking et  
532 al., 2014).

533

534 The principal difference between TypeTE and MELT derives from characteristics of the  
535 actual data on which the genotyping is performed. While both methods implement the



536 core genotyping algorithm described by Li (H. Li 2011), TypeTE relies on a strategy  
537 based on re-alignment of the reads against both presence and absence alleles before  
538 computation of the genotype likelihoods, an approach initially introduced by Wildschutte  
539 et al. (Wildschutte et al. 2015). Furthermore, TypeTE facilitates the genotyping with no  
540 user intervention by using as input the 'vcf' produced by MELT (or virtually any other  
541 pMEI detection software) to generate a new 'vcf' output file delivering the predicted  
542 genotypes. TypeTE also uses recently developed assemblers (SPAdes (Bankevich et  
543 al. 2012) and Minia (Chikhi and Rizk 2013)) and use reads from all individuals for a  
544 locus for local MEI assembly which, in our hands, showed a higher rate of assembly  
545 than the CAP3 assembler (Huang and Madan 1999) used previously (Wildschutte et al.  
546 2015). In addition, TypeTE can also genotype more pMEIs than previous studies based  
547 solely on *de-novo* MEI assembly (Wildschutte et al. 2015): if an incomplete Alu is  
548 assembled, TypeTE subsidize it with the exact consensus sequence based on TE's  
549 read identity with RepBase. This additional step is performed by retrieving the subfamily  
550 on which most discordant mates align in the assembly. Here, we show that  
551 reconstruction of alternative alleles (either by local assembly or consensus-based) -- a  
552 major difference with MELT -- significantly improves the accuracy of *Alu* genotyping.  
553 Finally, TypeTE predicts the TSD accompanying each insertion and the pMEI  
554 orientation, which ensures optimal reconstruction of the two alleles. Collectively these  
555 implementations enable TypeTE to generate highly accurate *Alu* insertion genotypes.  
556  
557 We further tested whether the quality of the starting dataset (in particular sequencing  
558 depth) influenced TypeTE performance. By comparing results on the 1000 GP and

559 SGDP datasets, which use different sequencing depth (on average 7.4X vs 42X,  
560 respectively), to the PCR genotypes, we found that TypeTE performs equally regardless  
561 of coverage depth (at least for reference insertions, for which we had enough loci to  
562 compare between datasets). In fact, using both non-reference and reference *Alu*  
563 insertions genotyped with TypeTE in the 1000 GP dataset, we showed that the average  
564 sequence coverage of the region flanking these loci does not seem to influence  
565 genotyping accuracy. Thus, TypeTE can support the analysis of large population  
566 dataset without stringent or highly uniform coverage requirements.

567

568 While TypeTE offers significant improvements over MELT, it still fails to genotype  
569 accurately some of the loci we experimentally assayed (16/227). Neither low  
570 sequencing coverage nor mappability issues could be readily implicated as hindering  
571 genotyping of these loci. We believe that other locus-specific idiosyncrasies prevent the  
572 ability of TypeTE to produce an accurate allele call. For instance, earlier tests on the  
573 pipeline showed that a 1-bp insertion at the end of the element in one allele or a slight  
574 error in the TSD prediction could dramatically affect the re-mapping and genotype  
575 predictions. A specific assessment of the bioinformatic methods aimed to identify TSDs  
576 should be able to improve this issue. Identifying boundaries of *Alu* insertion in low  
577 complexity (especially A-rich) regions is challenging due to inter-individual differences in  
578 the length of the poly-A tail of the element, and according to our tests, Repeatmasker  
579 often fails to identify the exact boundaries of such reference elements. Even though our  
580 pipeline in principle considers such subtle sequence variation, at least for one locus, we  
581 found that the TSD was overlapping the annotated poly-A region. Implementing

582 changes to identify similar instances could mitigate genotyping miscalls for those loci.  
583 Additionally, our ability to evaluate the concordance of genotype predictions in low-  
584 complexity and highly repetitive regions was restrained to PCR-accessible loci. We  
585 have also noticed that altering the parameters or method for local *de novo* assembly  
586 improved the assembly of certain TE loci. An automated approach to customize the  
587 assembly parameters for each locus that failed with the standard approach would  
588 enhance the reconstruction of non-reference TE sequences. Identifying proper  
589 orientation of insertions is also crucial in accurately genotyping the insertions and we  
590 are also contemplating a read-based approach to identify the orientation of insertions in  
591 addition to the current assembly-based approach. Collecting more benchmarking data  
592 might allow us to characterize more finely these issues and adapt the pipeline  
593 accordingly. Notwithstanding these peculiar instances, TypeTE has the lowest error rate  
594 of all methods tested and as such it represents a valuable advance in the field.

595  
596 The task and challenges of pMEI genotyping have been largely overlooked thus far, yet  
597 we show here that inaccurate genotyping of pMEIs can significantly bias population  
598 genetics inferences. It is presumably because of these issues that reference pMEIs  
599 have been entirely ignored in previous population genomics studies using pMEIs (L.  
600 Wang et al. 2016; L. Wang, Norris, and Jordan 2017)). By increasing genotyping  
601 accuracy for both reference and non-reference insertions, TypeTE will enhance future  
602 studies using pMEI as markers or structural variants in the human population. Notably,  
603 our results now offer a dataset of genotyped *Alu* insertions for 445 samples of the 1000  
604 GP that is complemented by a wealth of functional data including RNA-seq

605 (Lappalainen et al. 2013), DNA methylation (Pai et al. 2011), DNase I accessibility  
606 (Degner et al. 2012), and ATAC-seq (Kumasaka, Knights, and Gaffney 2016, 2019). We  
607 anticipate that these resources will open new avenues to explore the cis-regulatory  
608 influence of pMEIs in humans (L. Wang et al. 2016; L. Wang, Norris, and Jordan 2017;  
609 Rishishwar et al. 2018). The modularity of TypeTE allows one to easily combine new  
610 assemblers to improve the reconstruction of each pMEI, but it is also possible to skip  
611 this step and only use consensus sequence of MEI to speed up the computation time.  
612 The design of TypeTE makes it compatible with any data produced by pMEI detection  
613 tools and in principle it can be readily adapted to genotype insertions from any other  
614 retroelement families in virtually any species.

615

## 616 **DATA AVAILABILITY**

617 TypeTE is freely available in the Github repository <https://github.com/clemgoub/TypeTE>

618

## 619 **FUNDING**

620

621 This work was supported by funds from the National Institutes of Health (R35  
622 GM122550, R01 GM059290) to C.F and (GM118335 and GM059290) to L.B.J. Funding  
623 for open access charge: The funding body has no role in the design of the study and  
624 collection, analysis, and interpretation of data and in writing the manuscript.

625

## 626 **CONFLICT OF INTEREST**

627 The authors do not declare any conflict any interest.

628

## 629 REFERENCES

- 630 Bankevich, Anton, Sergey Nurk, Dmitry Antipov, Alexey A. Gurevich, Mikhail Dvorkin,  
631 Alexander S. Kulikov, Valery M. Lesin, et al. 2012. "SPAdes: A New Genome  
632 Assembly Algorithm and Its Applications to Single-Cell Sequencing." *Journal of*  
633 *Computational Biology: A Journal of Computational Molecular Cell Biology* 19 (5):  
634 455–77.
- 635 Boissinot, Stephane, Jerel Davis, Ali Entezam, Dimitri Petrov, and Anthony V. Furano.  
636 2006. "Fitness Cost of LINE-1 (L1) Activity in Humans." *Proceedings of the National*  
637 *Academy of Sciences of the United States of America* 103 (25): 9590–94.
- 638 Chen, Jinfeng, Travis R. Wrightsman, Susan R. Wessler, and Jason E. Stajich. 2017.  
639 "RelocaTE2: A High Resolution Transposable Element Insertion Site Mapping Tool  
640 for Population Resequencing." *PeerJ* 5 (January): e2942.
- 641 Chen, Xun, and Dawei Li. 2019. "ERVcaller: Identifying Polymorphic Endogenous  
642 Retrovirus and Other Transposable Element Insertions Using Whole-Genome  
643 Sequencing Data." *Bioinformatics*. <https://doi.org/10.1093/bioinformatics/btz205>.
- 644 Chikhi, Rayan, and Guillaume Rizk. 2013. "Space-Efficient and Exact de Bruijn Graph  
645 Representation Based on a Bloom Filter." *Algorithms for Molecular Biology: AMB* 8  
646 (1): 22.
- 647 Chuong, Edward B., Nels C. Elde, and Cédric Feschotte. 2017. "Regulatory Activities of  
648 Transposable Elements: From Conflicts to Benefits." *Nature Reviews. Genetics* 18  
649 (2): 71–86.
- 650 Cordaux, Richard, Jungnam Lee, Liv Dinoso, and Mark A. Batzer. 2006. "Recently  
651 Integrated Alu Retrotransposons Are Essentially Neutral Residents of the Human  
652 Genome." *Gene* 373 (May): 138–44.
- 653 Degner, Jacob F., Athma A. Pai, Roger Pique-Regi, Jean-Baptiste Veyrieras, Daniel J.  
654 Gaffney, Joseph K. Pickrell, Sherryl De Leon, et al. 2012. "DNase I Sensitivity QTLs  
655 Are a Major Determinant of Human Expression Variation." *Nature* 482 (7385): 390–  
656 94.
- 657 Dewannieux, Marie, Cécile Esnault, and Thierry Heidmann. 2003. "LINE-Mediated  
658 Retrotransposition of Marked Alu Sequences." *Nature Genetics* 35 (1): 41–48.
- 659 Doronina, Liliya, Olga Reising, Hiram Clawson, David A. Ray, and Jürgen Schmitz.  
660 2019. "True Homoplasmy of Retrotransposon Insertions in Primates." *Systematic*  
661 *Biology* 68 (3): 482–93.
- 662 Fiston-Lavier, Anna-Sophie, Maite G. Barrón, Dmitri A. Petrov, and Josefa González.  
663 2015. "T-lex2: Genotyping, Frequency Estimation and Re-Annotation of  
664 Transposable Elements Using Single or Pooled next-Generation Sequencing Data."  
665 *Nucleic Acids Research* 43 (4): e22.
- 666 Gardner, Eugene J., Vincent K. Lam, Daniel N. Harris, Nelson T. Chuang, Emma C.  
667 Scott, W. Stephen Pittard, Ryan E. Mills, 1000 Genomes Project Consortium, and  
668 Scott E. Devine. 2017. "The Mobile Element Locator Tool (MELT): Population-Scale  
669 Mobile Element Discovery and Biology." *Genome Research* 27 (11): 1916–29.
- 670 Goerner-Potvin, Patricia, and Guillaume Bourque. 2018. "Computational Tools to  
671 Unmask Transposable Elements." *Nature Reviews. Genetics* 19 (11): 688–704.
- 672 Hancks, Dustin C., and Haig H. Kazazian Jr. 2012. "Active Human Retrotransposons:  
673 Variation and Disease." *Current Opinion in Genetics & Development* 22 (3): 191–

- 674 203.———. 2016. “Roles for Retrotransposon Insertions in Human Disease.” *Mobile*  
675 *DNA* 7 (May): 9. 1.
- 676 Hosking L, Lumsden S, Lewis K, Yeo A, McCarthy L, Bansal A, Riley J, Purvis I, Xu C-  
677 F. 2004 Detection of genotyping errors by Hardy–Weinberg equilibrium testing. *Eur.*  
678 *J. Hum. Genet.* 12, 395–399. (doi:10.1038/sj.ejhg.5201164)
- 679 Horváth, Vivien, Miriam Merenciano, and Josefa González. 2017. “Revisiting the  
680 Relationship between Transposable Elements and the Eukaryotic Stress  
681 Response.” *Trends in Genetics: TIG* 33 (11): 832–41.
- 682 Huang, X., and A. Madan. 1999. “CAP3: A DNA Sequence Assembly Program.”  
683 *Genome Research* 9 (9): 868–77.
- 684 Hueso, Miguel, Josep M. Cruzado, Joan Torras, and Estanis Navarro. n.d.  
685 “ALUminating the Path of Atherosclerosis Progression: Chaos Theory Suggests a  
686 Role for Alu Repeats in the Development of Atherosclerotic Vascular Disease.”  
687 <https://doi.org/10.20944/preprints201804.0051.v1>.
- 688 Jangam, Diwash, Cédric Feschotte, and Esther Betrán. 2017. “Transposable Element  
689 Domestication As an Adaptation to Evolutionary Conflicts.” *Trends in Genetics: TIG*  
690 33 (11): 817–31.
- 691 Jordan, Vallmer E., Jerilyn A. Walker, Thomas O. Beckstrom, Cody J. Steely, Cullen L.  
692 McDaniel, Corey P. St Romain, Baboon Genome Analysis Consortium, et al. 2018.  
693 “A Computational Reconstruction of Phylogeny Using Insertion Polymorphisms.”  
694 *Mobile DNA* 9 (April): 13.
- 695 Jurka, Jerzy, Weidong Bao, and Kenji K. Kojima. 2011. “Families of Transposable  
696 Elements, Population Structure and the Origin of Species.” *Biology Direct* 6  
697 (September): 44.
- 698 Jurka, Jerzy, Oleksiy Kohany, Adam Pavlicek, Vladimir V. Kapitonov, and Michael V.  
699 Jurka. 2004. “Duplication, Coclustering, and Selection of Human Alu  
700 Retrotransposons.” *Proceedings of the National Academy of Sciences of the United*  
701 *States of America* 101 (5): 1268–72.
- 702 Keane, Thomas M., Kim Wong, and David J. Adams. 2013. “RetroSeq: Transposable  
703 Element Discovery from next-Generation Sequencing Data.” *Bioinformatics* 29 (3):  
704 389–90.
- 705 Kent, W. J., A. S. Zweig, G. Barber, A. S. Hinrichs, and D. Karolchik. 2010. “BigWig and  
706 BigBed: Enabling Browsing of Large Distributed Datasets.” *Bioinformatics*.  
707 <https://doi.org/10.1093/bioinformatics/btq351>.
- 708 Kidwell, M. G., and D. Lisch. 1997. “Transposable Elements as Sources of Variation in  
709 Animals and Plants.” *Proceedings of the National Academy of Sciences of the*  
710 *United States of America* 94 (15): 7704–11.
- 711 Kumasaka, Natsuhiko, Andrew J. Knights, and Daniel J. Gaffney. 2016. “Fine-Mapping  
712 Cellular QTLs with RASQUAL and ATAC-Seq.” *Nature Genetics* 48 (2): 206–13.  
713 ———. 2019. “High-Resolution Genetic Mapping of Putative Causal Interactions  
714 between Regions of Open Chromatin.” *Nature Genetics* 51 (1): 128–37.
- 715 Lappalainen, Tuuli, Michael Sammeth, Marc R. Friedländer, Peter A. C. ’t Hoen, Jean  
716 Monlong, Manuel A. Rivas, Mar González-Porta, et al. 2013. “Transcriptome and  
717 Genome Sequencing Uncovers Functional Variation in Humans.” *Nature* 501  
718 (7468): 506–11.
- 719 Larsen, Peter A., Kelsie E. Hunnicutt, Roxanne J. Larsen, Anne D. Yoder, and Ann M.



- 720 Saunders. 2018. "Warning SINEs: Alu Elements, Evolution of the Human Brain, and  
721 the Spectrum of Neurological Disease." *Chromosome Research: An International*  
722 *Journal on the Molecular, Supramolecular and Evolutionary Aspects of*  
723 *Chromosome Biology* 26 (1-2): 93–111.
- 724 Lee, Eunjung, Rebecca Iskow, Lixing Yang, Omer Gokcumen, Psalm Haseley, Lovelace  
725 J. Luquette 3rd, Jens G. Lohr, et al. 2012. "Landscape of Somatic  
726 Retrotransposition in Human Cancers." *Science* 337 (6097): 967–71.
- 727 Li, H. 2011. "A Statistical Framework for SNP Calling, Mutation Discovery, Association  
728 Mapping and Population Genetical Parameter Estimation from Sequencing Data."  
729 *Bioinformatics*. <https://doi.org/10.1093/bioinformatics/btr509>.
- 730 Li, H., and R. Durbin. 2009. "Fast and Accurate Short Read Alignment with Burrows-  
731 Wheeler Transform." *Bioinformatics*. <https://doi.org/10.1093/bioinformatics/btp324>.
- 732 Li, Heng, Bob Handsaker, Alec Wysoker, Tim Fennell, Jue Ruan, Nils Homer, Gabor  
733 Marth, Goncalo Abecasis, Richard Durbin, and 1000 Genome Project Data  
734 Processing Subgroup. 2009. "The Sequence Alignment/Map Format and SAMtools."  
735 *Bioinformatics* 25 (16): 2078–79.
- 736 Mallick, Swapan, Heng Li, Mark Lipson, Iain Mathieson, Melissa Gymrek, Fernando  
737 Racimo, Mengyao Zhao, et al. 2016. "The Simons Genome Diversity Project: 300  
738 Genomes from 142 Diverse Populations." *Nature* 538 (7624): 201–6.
- 739 Mills, Ryan E., E. Andrew Bennett, Rebecca C. Iskow, and Scott E. Devine. 2007.  
740 "Which Transposable Elements Are Active in the Human Genome?" *Trends in*  
741 *Genetics*. <https://doi.org/10.1016/j.tig.2007.02.006>.
- 742 Neph, Shane, M. Scott Kuehn, Alex P. Reynolds, Eric Haugen, Robert E. Thurman,  
743 Audra K. Johnson, Eric Rynes, et al. 2012. "BEDOPS: High-Performance Genomic  
744 Feature Operations." *Bioinformatics* 28 (14): 1919–20.
- 745 Oliver, Keith R., Jen A. McComb, and Wayne K. Greene. 2013. "Transposable  
746 Elements: Powerful Contributors to Angiosperm Evolution and Diversity." *Genome*  
747 *Biology and Evolution* 5 (10): 1886–1901.
- 748 Pai, Athma A., Jordana T. Bell, John C. Marioni, Jonathan K. Pritchard, and Yoav Gilad.  
749 2011. "A Genome-Wide Study of DNA Methylation Patterns and Gene Expression  
750 Levels in Multiple Human and Chimpanzee Tissues." *PLoS Genetics* 7 (2):  
751 e1001316.
- 752 Payer, Lindsay M., Jared P. Steranka, Daniel Ardeljan, Janiece Walker, Kathryn C.  
753 Fitzgerald, Peter A. Calabresi, Thomas A. Cooper, and Kathleen H. Burns. 2019.  
754 "Alu Insertion Variants Alter mRNA Splicing." *Nucleic Acids Research* 47 (1): 421–  
755 31.
- 756 Payer, Lindsay M., Jared P. Steranka, Wan Rou Yang, Maria Kryatova, Sibyl  
757 Medabalimi, Daniel Ardeljan, Chunhong Liu, Jef D. Boeke, Dimitri Avramopoulos,  
758 and Kathleen H. Burns. 2017. "Structural Variants Caused by Insertions Are  
759 Associated with Risks for Many Human Diseases." *Proceedings of the National*  
760 *Academy of Sciences of the United States of America* 114 (20): E3984–92.
- 761 Rajaby, Ramesh, and Wing-Kin Sung. 2018. "TranSurVeyor: An Improved Database-  
762 Free Algorithm for Finding Non-Reference Transpositions in High-Throughput  
763 Sequencing Data." *Nucleic Acids Research* 46 (20): e122.
- 764 Rishishwar, Lavanya, Leonardo Mariño-Ramírez, and I. King Jordan. 2016.  
765 "Benchmarking Computational Tools for Polymorphic Transposable Element

- 766 Detection.” *Briefings in Bioinformatics*. <https://doi.org/10.1093/bib/bbw072>.
- 767 Rishishwar, Lavanya, Carlos E. Tellez Villa, and I. King Jordan. 2015. “Transposable  
768 Element Polymorphisms Recapitulate Human Evolution.” *Mobile DNA* 6  
769 (November): 21.
- 770 Rishishwar, Lavanya, Lu Wang, Jianrong Wang, Soojin V. Yi, Joseph Lachance, and I.  
771 King Jordan. 2018. “Evidence for Positive Selection on Recent Human  
772 Transposable Element Insertions.” *Gene*.  
773 <https://doi.org/10.1016/j.gene.2018.06.077>.
- 774 Santander, Cindy G., Philippe Gambrun, Emanuele Marchi, Timokratis Karamitros, Aris  
775 Katzourakis, and Gkikas Magiorkinis. 2017. “STEAK: A Specific Tool for  
776 Transposable Elements and Retrovirus Detection in High-Throughput Sequencing  
777 Data.” *Virus Evolution* 3 (2): vex023.
- 778 Song, Mingzhou, and Stéphane Boissinot. 2007. “Selection against LINE-1  
779 Retrotransposons Results Principally from Their Ability to Mediate Ectopic  
780 Recombination.” *Gene* 390 (1-2): 206–13.
- 781 Stewart, Chip, Deniz Kural, Michael P. Strömberg, Jerilyn A. Walker, Miriam K. Konkel,  
782 Adrian M. Stütz, Alexander E. Urban, et al. 2011. “A Comprehensive Map of Mobile  
783 Element Insertion Polymorphisms in Humans.” *PLoS Genetics* 7 (8): e1002236.
- 784 Sudmant, Peter H., Tobias Rausch, Eugene J. Gardner, Robert E. Handsaker, Alexej  
785 Abyzov, John Huddleston, Yan Zhang, et al. 2015. “An Integrated Map of Structural  
786 Variation in 2,504 Human Genomes.” *Nature* 526 (7571): 75–81.
- 787 Thomas, Jainy, Hervé Perron, and Cédric Feschotte. 2018. “Variation in Proviral  
788 Content among Human Genomes Mediated by LTR Recombination.” *Mobile DNA* 9  
789 (December): 36.
- 790 Thung, Djie Tjwan, Joep de Ligt, Lisenka E. M. Vissers, Marloes Steehouwer, Mark  
791 Kroon, Petra de Vries, Eline P. Slagboom, Kai Ye, Joris A. Veltman, and Jayne Y.  
792 Hehir-Kwa. 2014. “Mobster: Accurate Detection of Mobile Element Insertions in next  
793 Generation Sequencing Data.” *Genome Biology* 15 (10): 488.
- 794 Underwood, Charles J., Ian R. Henderson, and Robert A. Martienssen. 2017. “Genetic  
795 and Epigenetic Variation of Transposable Elements in Arabidopsis.” *Current Opinion  
796 in Plant Biology* 36 (April): 135–41.
- 797 Untergasser, Andreas, Ioana Cutcutache, Triinu Koressaar, Jian Ye, Brant C. Faircloth,  
798 Mairo Remm, and Steven G. Rozen. 2012. “Primer3--New Capabilities and  
799 Interfaces.” *Nucleic Acids Research* 40 (15): e115.
- 800 Wallace, Amelia D., George A. Wendt, Lisa F. Barcellos, Adam J. de Smith, Kyle M.  
801 Walsh, Catherine Metayer, Joseph F. Costello, Joseph L. Wiemels, and Stephen S.  
802 Francis. 2018. “To ERV Is Human: A Phenotype-Wide Scan Linking Polymorphic  
803 Human Endogenous Retrovirus-K Insertions to Complex Phenotypes.” *Frontiers in  
804 Genetics* 9 (August): 298.
- 805 Wang, Lu, Emily T. Norris, and I. K. Jordan. 2017. “Human Retrotransposon Insertion  
806 Polymorphisms Are Associated with Health and Disease via Gene Regulatory  
807 Phenotypes.” *Frontiers in Microbiology*. <https://doi.org/10.3389/fmicb.2017.01418>.
- 808 Wang, Lu, Lavanya Rishishwar, Leonardo Mariño-Ramírez, and I. King Jordan. 2016.  
809 “Human Population-Specific Gene Expression and Transcriptional Network  
810 Modification with Polymorphic Transposable Elements.” *Nucleic Acids Research*.  
811 <https://doi.org/10.1093/nar/gkw1286>.



- 812 Wang, Su, Chongzhi Zang, Tengfei Xiao, Jingyu Fan, Shenglin Mei, Qian Qin, Qiu Wu,  
813 et al. 2016. "Modeling Cis-Regulation with a Compendium of Genome-Wide Histone  
814 H3K27ac Profiles." *Genome Research* 26 (10): 1417–29.
- 815 Watkins, W. Scott, Alan R. Rogers, Christopher T. Ostler, Steve Wooding, Michael J.  
816 Bamshad, Anna-Marie E. Brassington, Marion L. Carroll, et al. 2003. "Genetic  
817 Variation among World Populations: Inferences from 100 Alu Insertion  
818 Polymorphisms." *Genome Research* 13 (7): 1607–18.
- 819 Wildschutte, Julia H., Alayna Baron, Nicolette M. Diroff, and Jeffrey M. Kidd. 2015.  
820 "Discovery and Characterization of Alu Repeat Sequences via Precise Local Read  
821 Assembly." *Nucleic Acids Research* 43 (21): 10292–307.
- 822 Xing, Jinchuan, Yuhua Zhang, Kyudong Han, Abdel Halim Salem, Shurjo K. Sen, Chad  
823 D. Huff, Qiong Zhou, et al. 2009. "Mobile Elements Create Structural Variation:  
824 Analysis of a Complete Human Genome." *Genome Research* 19 (9): 1516–26.

825  
826  
827  
828

## 829 **TABLE AND FIGURES LEGENDS**

830

831 **Figure 1: Overview of the TypeTE pipeline.** TypeTE is divided in two main scripts.  
832 The first (A) genotypes non-reference insertion (TypeTE-nonref) and the second (B)  
833 genotypes reference pMEI (TypeTE-ref). (A) TypeTE-ref creates the reference allele  
834 (REF) by extracting +/- 500 bps from the *Alu* predicted breakpoint. The alternate allele  
835 (ALT), corresponding to the pMEI presence is made by 1-2) removing the predicted  
836 TSD from the +/- 500 bps extracted sequence. Then, for each locus, read pairs  
837 (including discordant mates) are extracted from the individual bam files and are pooled  
838 for local assembly (3). If TSDs are identified in the assembly, the sequence is then  
839 inserted onto the flanking (4). In case the assembly is incomplete, the Repbase  
840 consensus for the predicted TE family is inserted instead (4). (B) The REF allele is  
841 created after extraction of +/- 500 bps from the 5' and 3' ends of the adjusted *Alu*  
842 position (including TSDs). The ALT allele is then created removing the *Alu* sequence  
843 and 1 TSD from the same extracted sequence. (C) Genotyping. For each locus, read-

844 pairs of each sample are extracted in a 500 bps window centered on the predicted  
845 breakpoint. For each sample, these reads are then mapped to the two alleles and  
846 genotype likelihood are computed.

847

848 **Figure 2: Comparison of the predicted genotypes in the 1000 GP dataset with**  
849 **PCR-assays in 42 CEU individuals.** Each vertical bar represents one locus, and  
850 match or error regarding the genotype for each individual are piled up on the Y axis and  
851 color coded according to the legend. NA values (no genotype predicted or failed PCR)  
852 are removed from the plot. >

853

854 **Figure 3: Comparison of the predicted genotypes in the SGDP dataset with PCR-**  
855 **assays in 14 South Asian individuals.** Each vertical bar represents one locus, and  
856 match or error regarding the genotype for each individual are piled up on the Y axis and  
857 color coded according to the legend. NA values (no genotype predicted or failed PCR)  
858 are removed from the plot. >

859

860 **Figure 4: Average error rate per locus across methods and datasets.** Different  
861 letters indicate significant difference. Tukey's HSD,  $P < 0.05$ ; NS: Not significant>

862

863 **FIGURE 5: Effect of method and dataset on variant discovery performance.**

864 Sensitivity, precision and F1 score are compared for each dataset (1000 GP and  
865 SGDP) according to the type of insertion (non-reference vs reference) and the  
866 genotyping method used (1000 GP, MELT2.1.4 and TypeTE). Error bars: 95%

867 confidence interval. Non-overlapping intervals denotes a significant difference between  
868 scores.

869

870 **FIGURE 6: Per locus inbreeding coefficient (Fis).** The Fis is estimated for each locus  
871 using the alleles frequencies given by each method (1000 GP: original 1000 GP  
872 genotypes, MELT2, TypeTE and PCR assays) and for each of the 1000 GP (n = 42  
873 individuals) and SGDP (n = 9 individuals) datasets. Red dashed-line: expected Fis at  
874 Hardy-Weinberg equilibrium (Fis = 0).

TypeTE non-reference

TypeTE reference

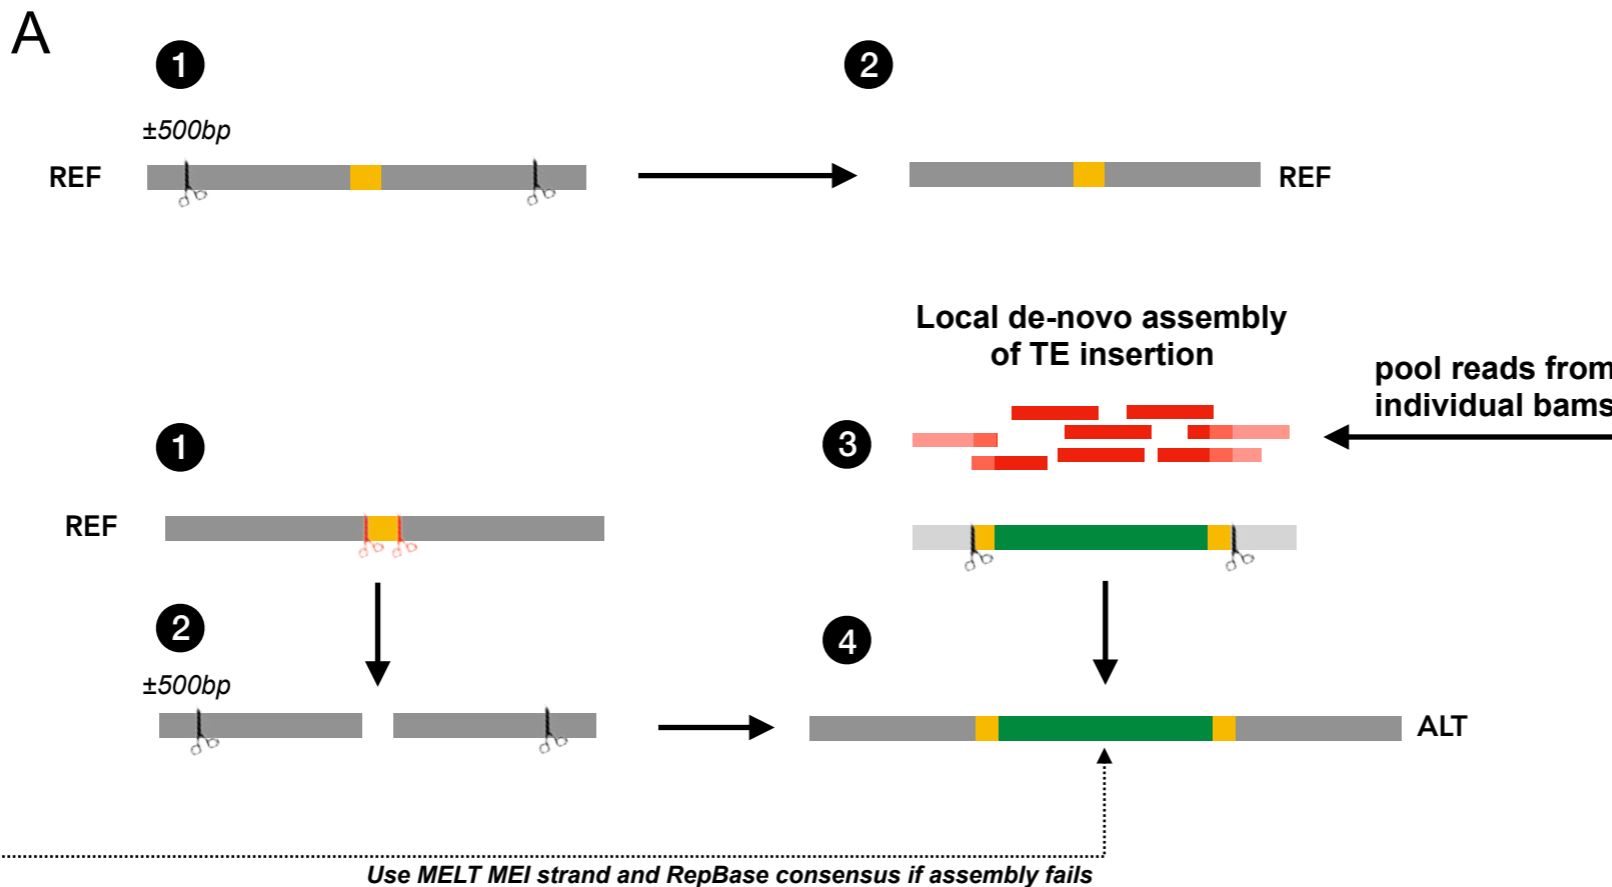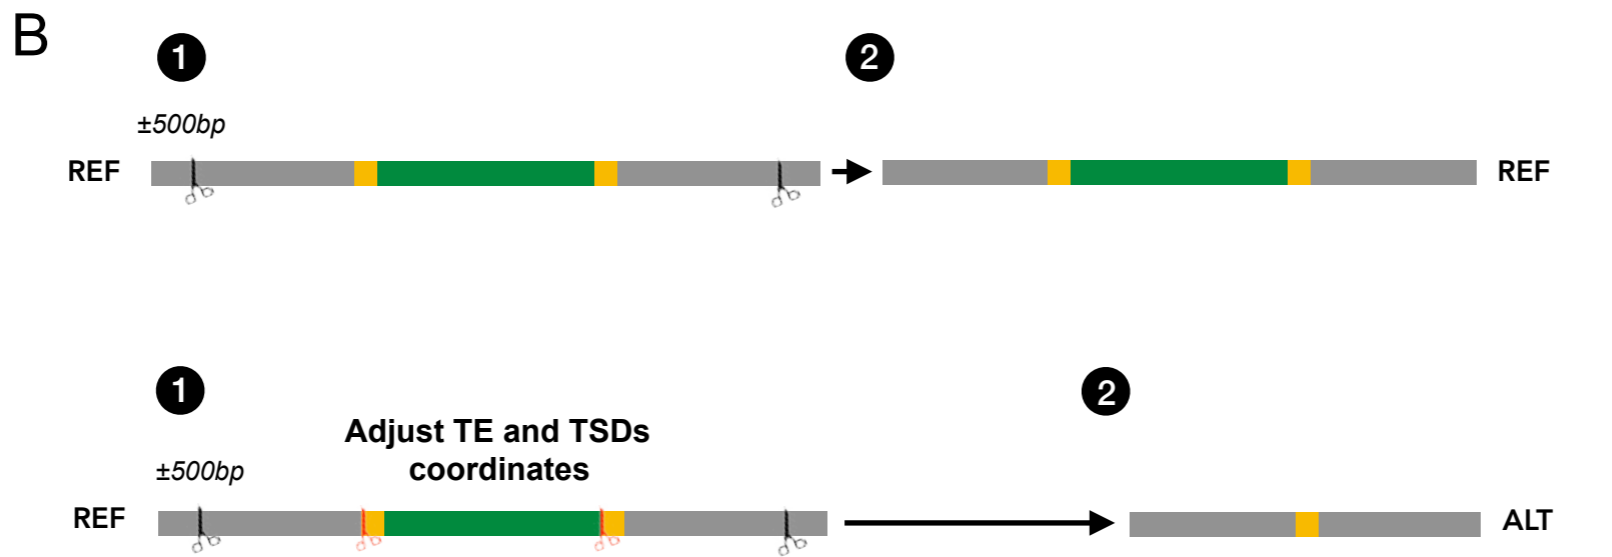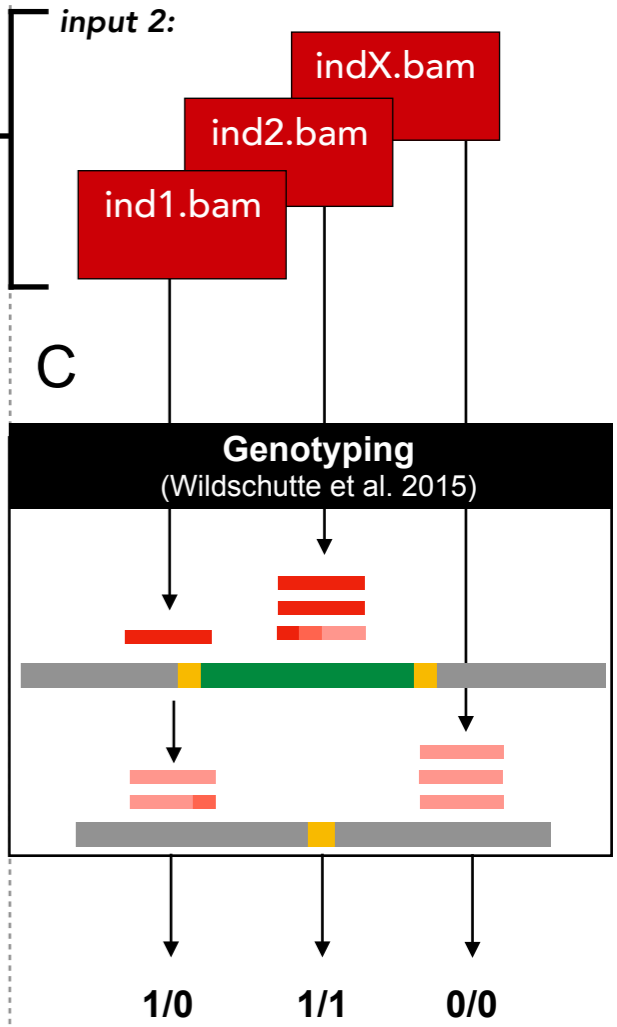

input 1:  
input.vcf  
breakpoints,  
TSD,  
strand

expected *Alu* insertion flanking TSD ALU AAA<sub>n</sub> TSD

### non-reference Alu

### reference Alu

A

1000GP

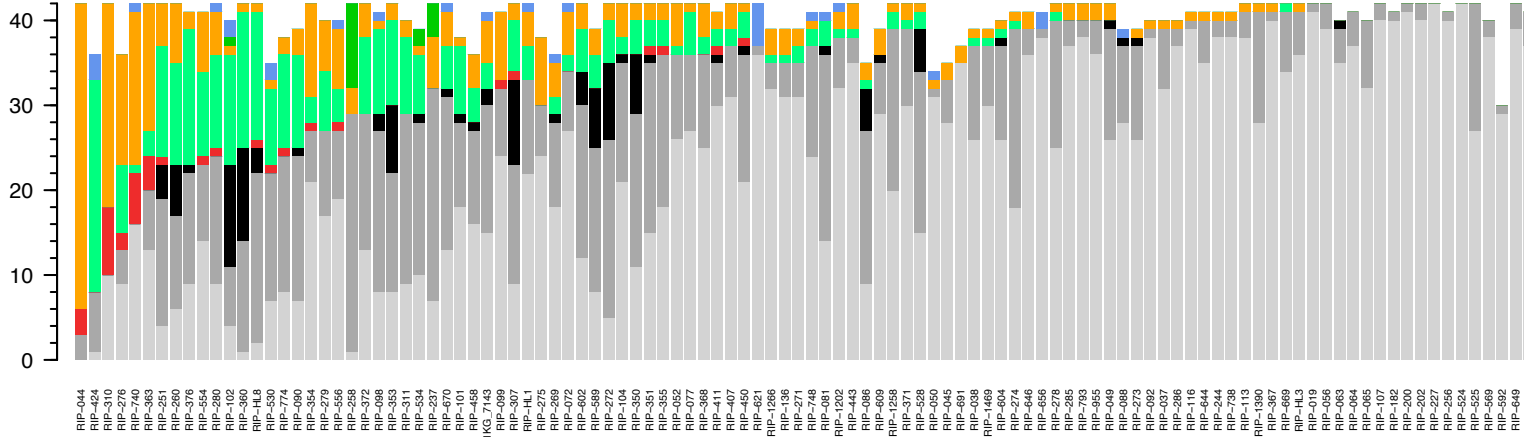

A

1000GP

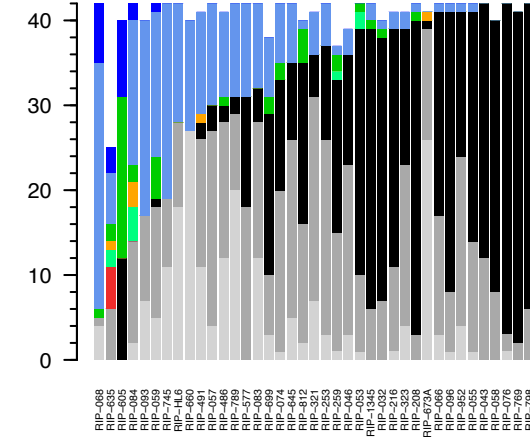

B

MELT 2.1.4

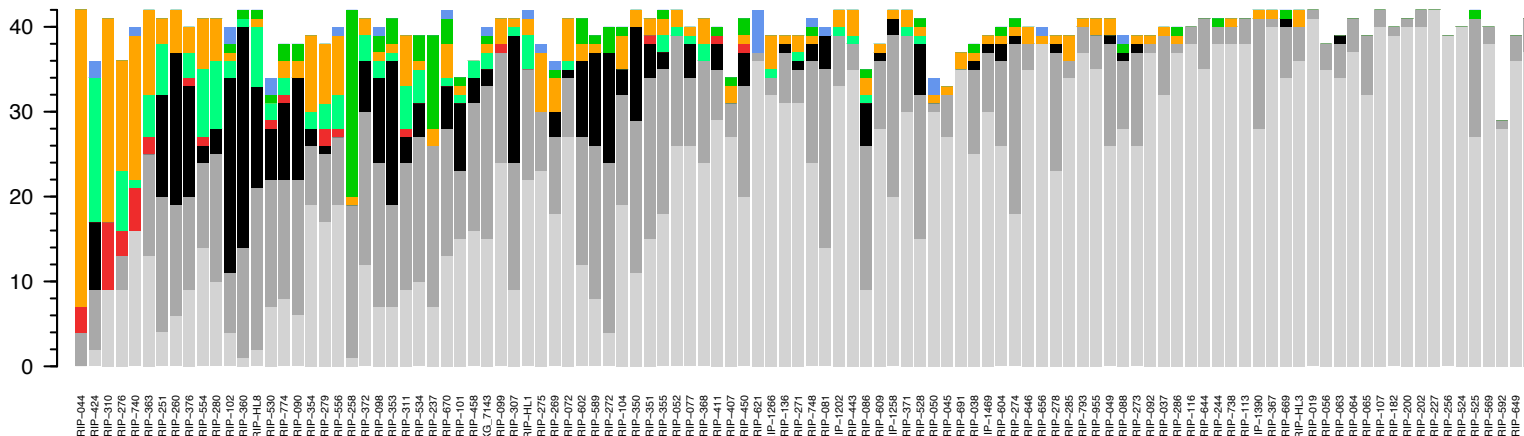

B

MELT 2.1.4

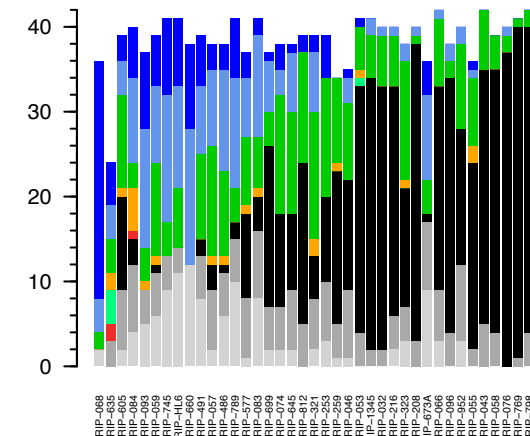

C

TypeTE

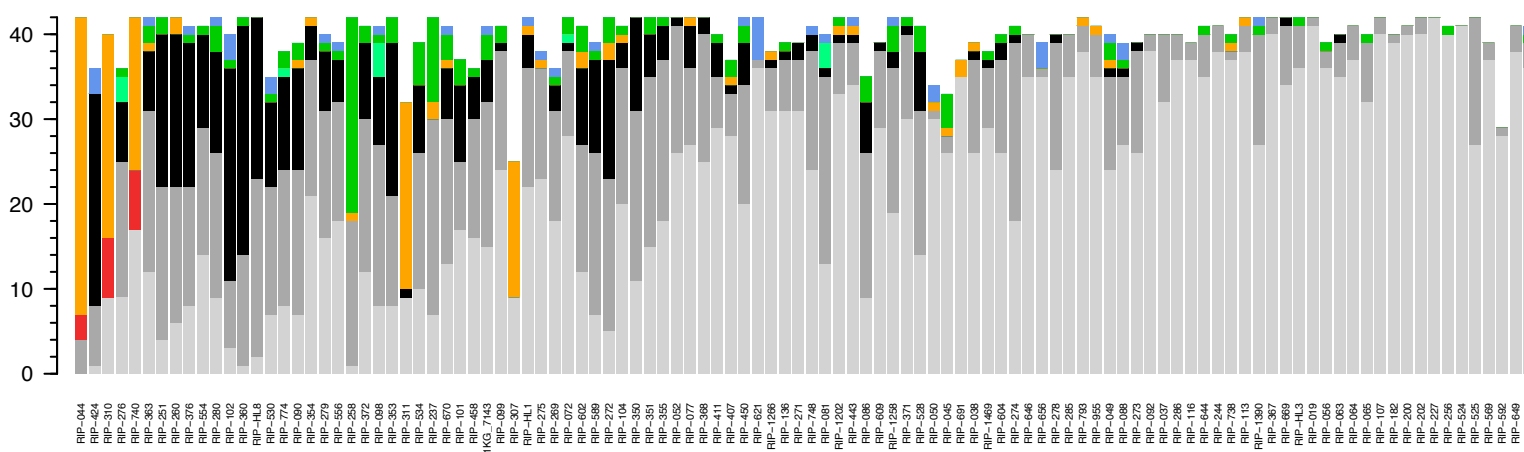

C

TypeTE

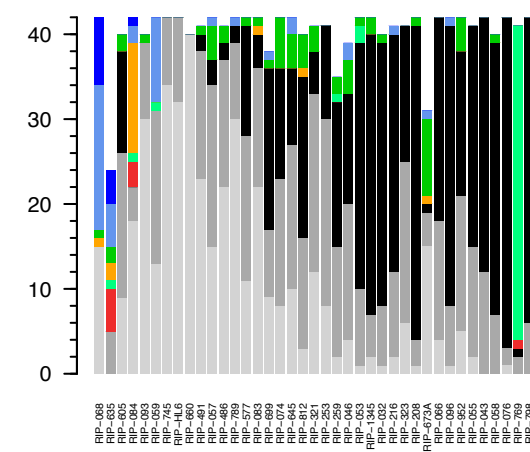

Prediction → PCR    □ identical 0    □ identical 1    ■ identical 2    ■ 0 → 2    ■ 0 → 1    ■ 2 → 1    ■ 1 → 2    ■ 1 → 0    ■ 2 → 0

# non-reference Alu

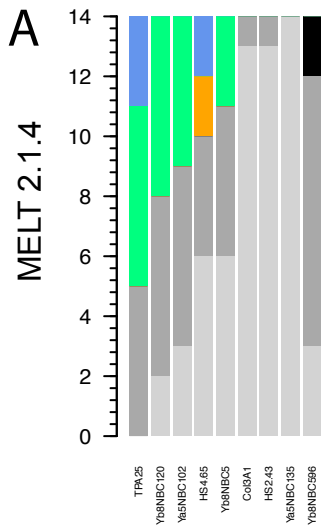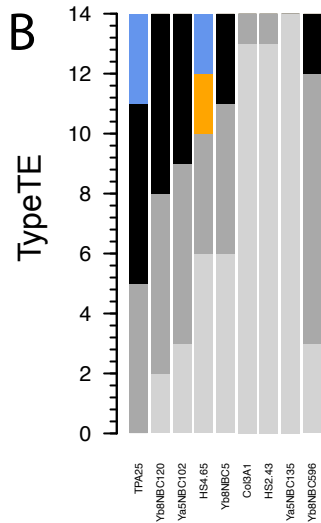

# reference Alu

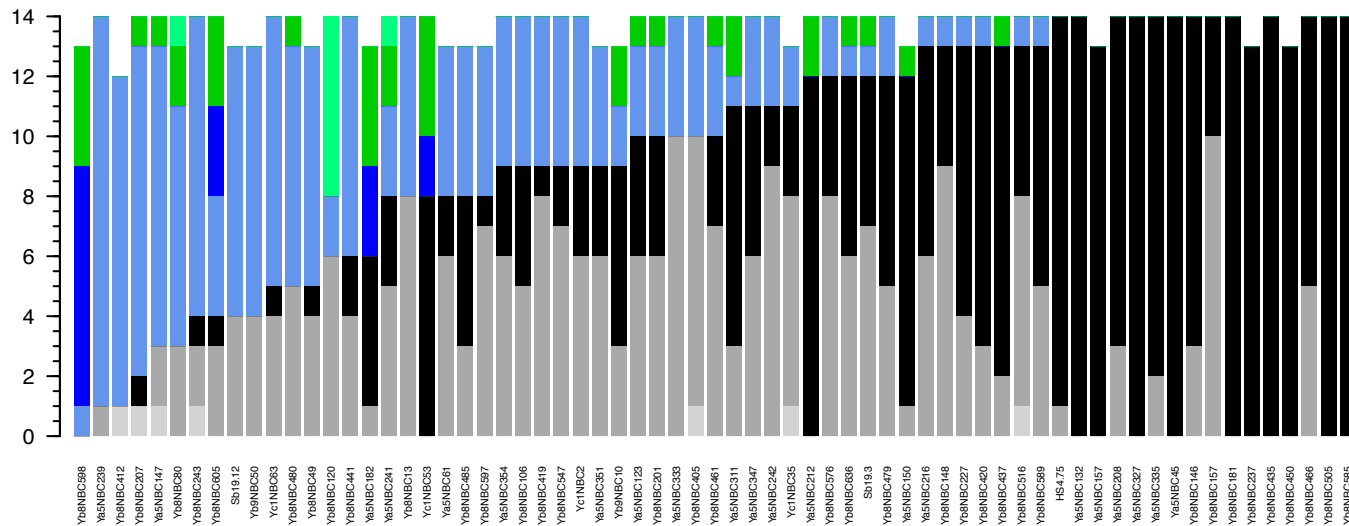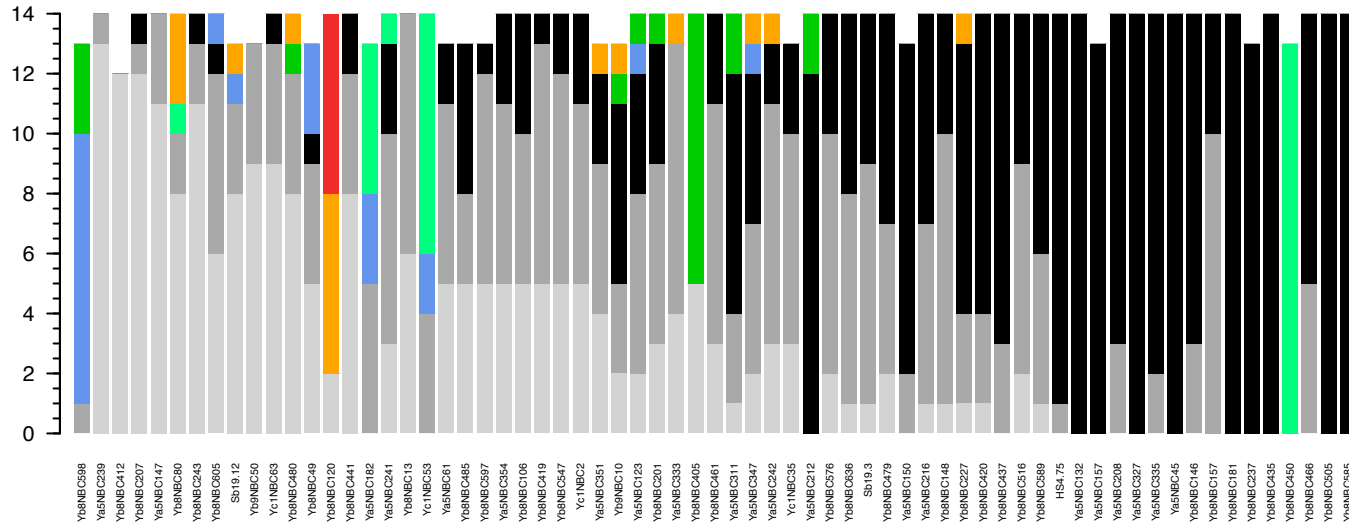

Prediction → PCR

□ identical 0   □ identical 1   ■ identical 2   ■ 0 → 2   ■ 0 → 1   ■ 2 → 1   ■ 1 → 2   ■ 1 → 0   ■ 2 → 0

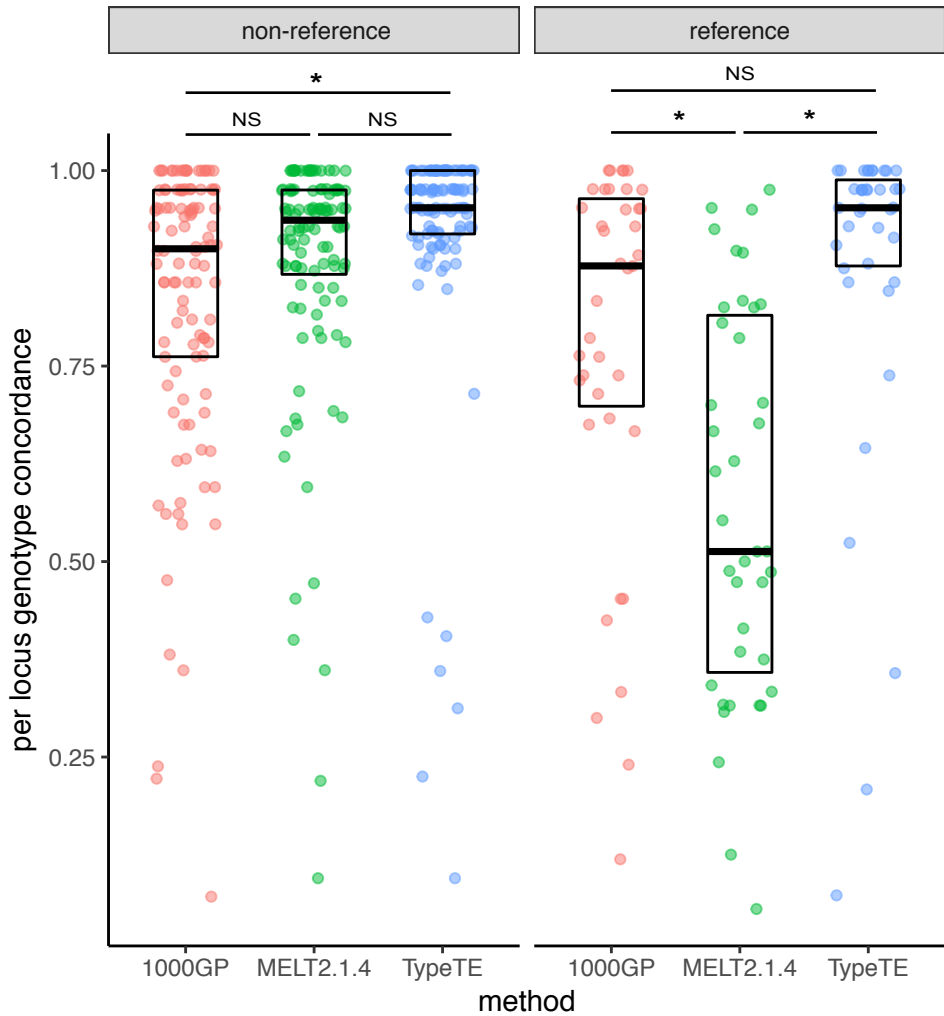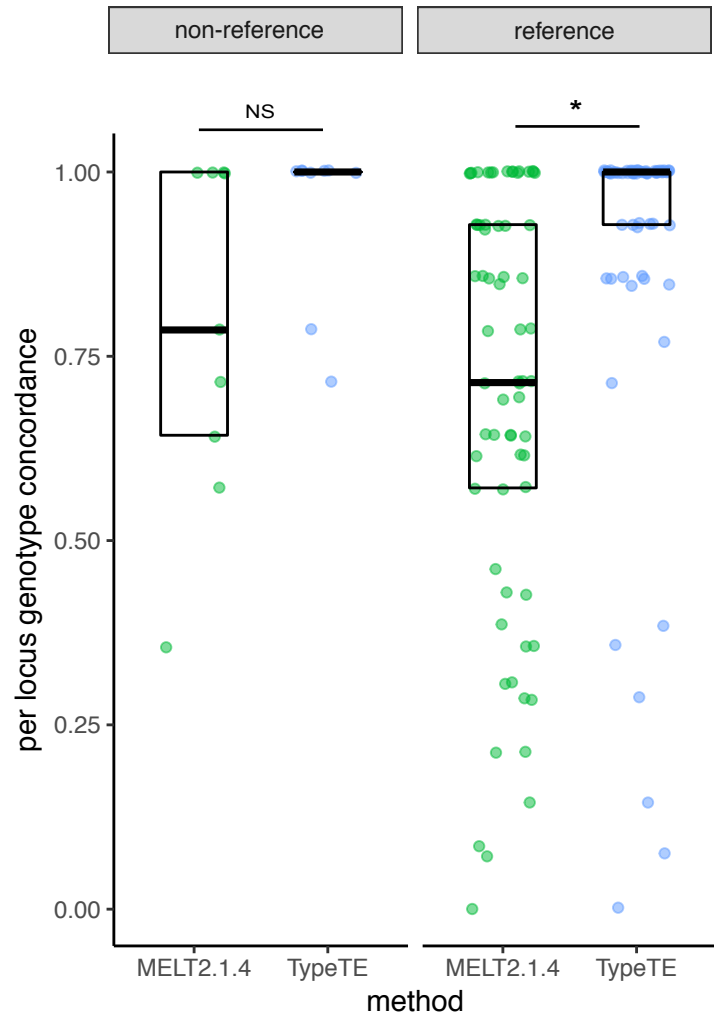

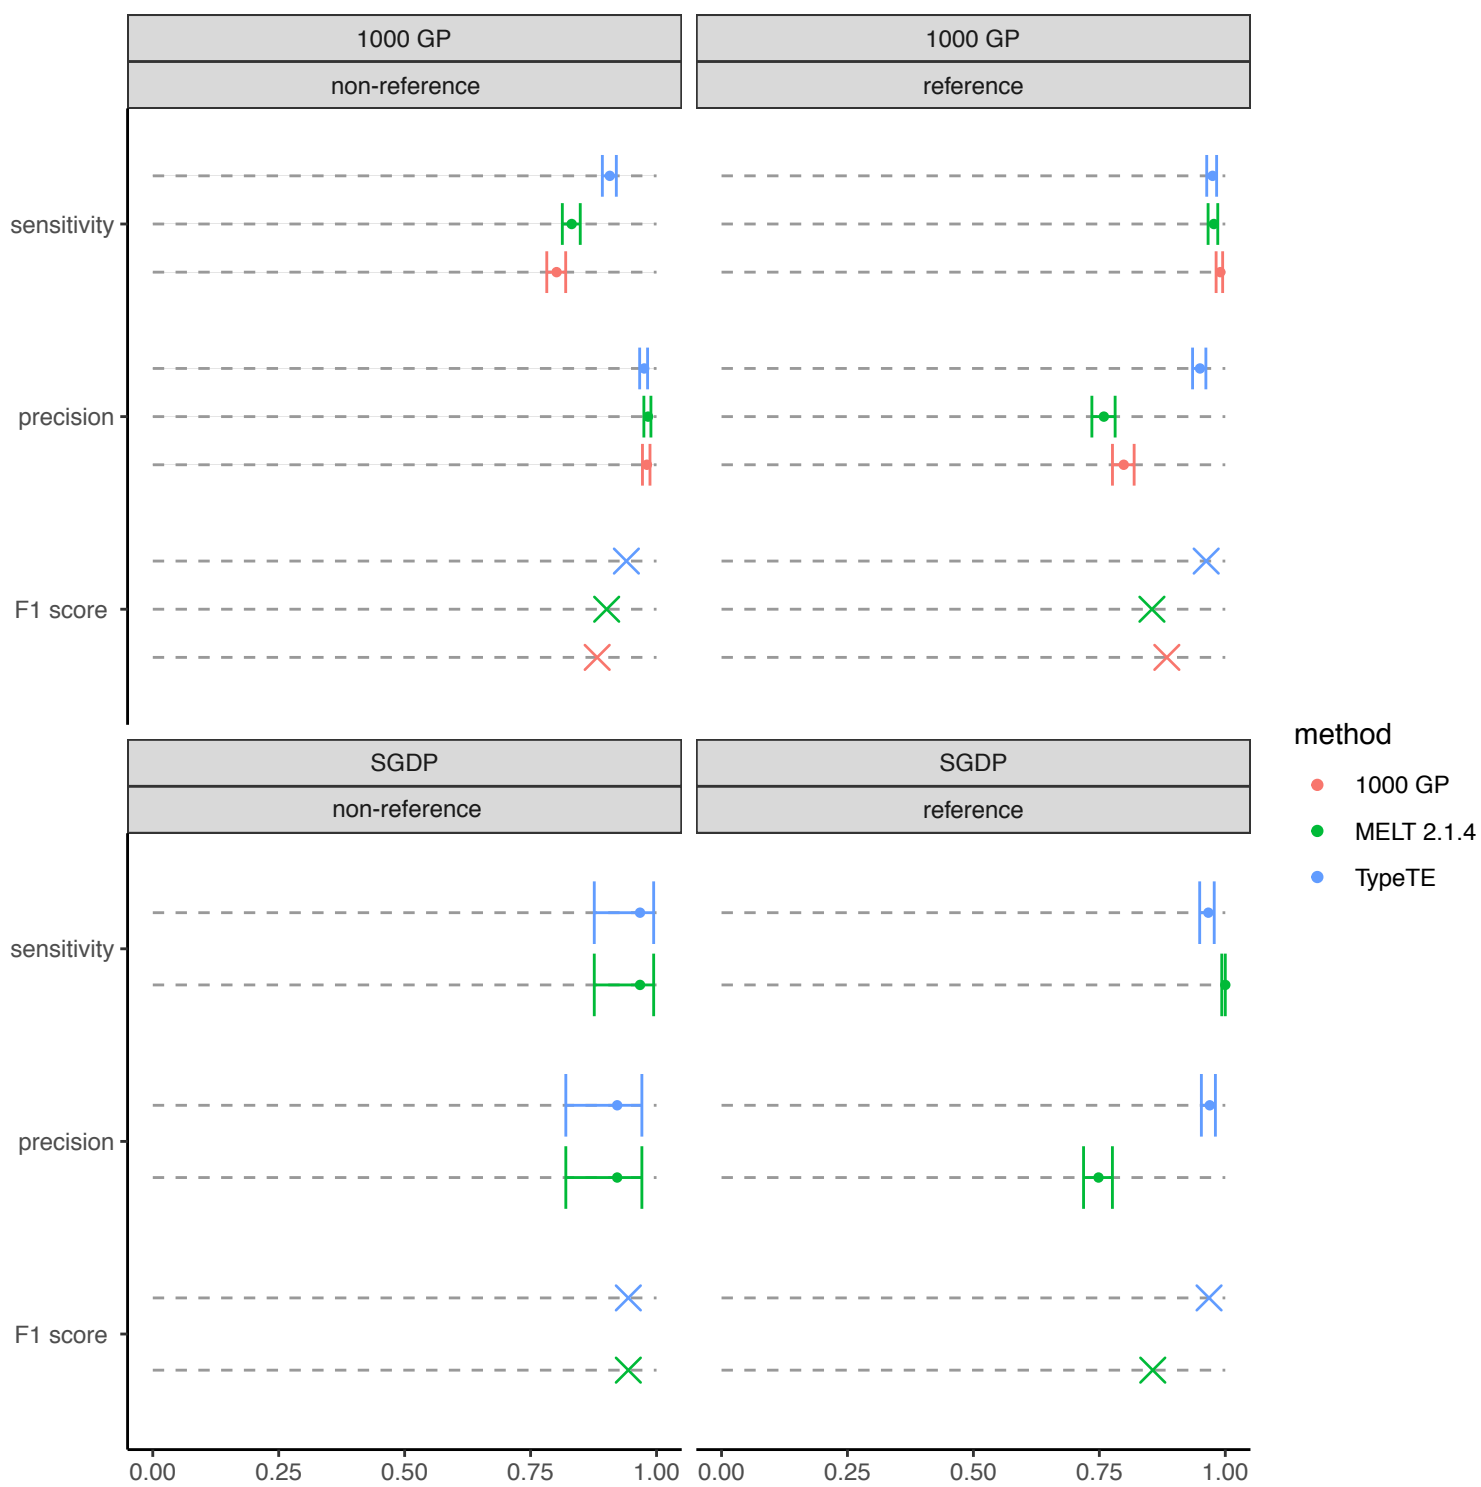



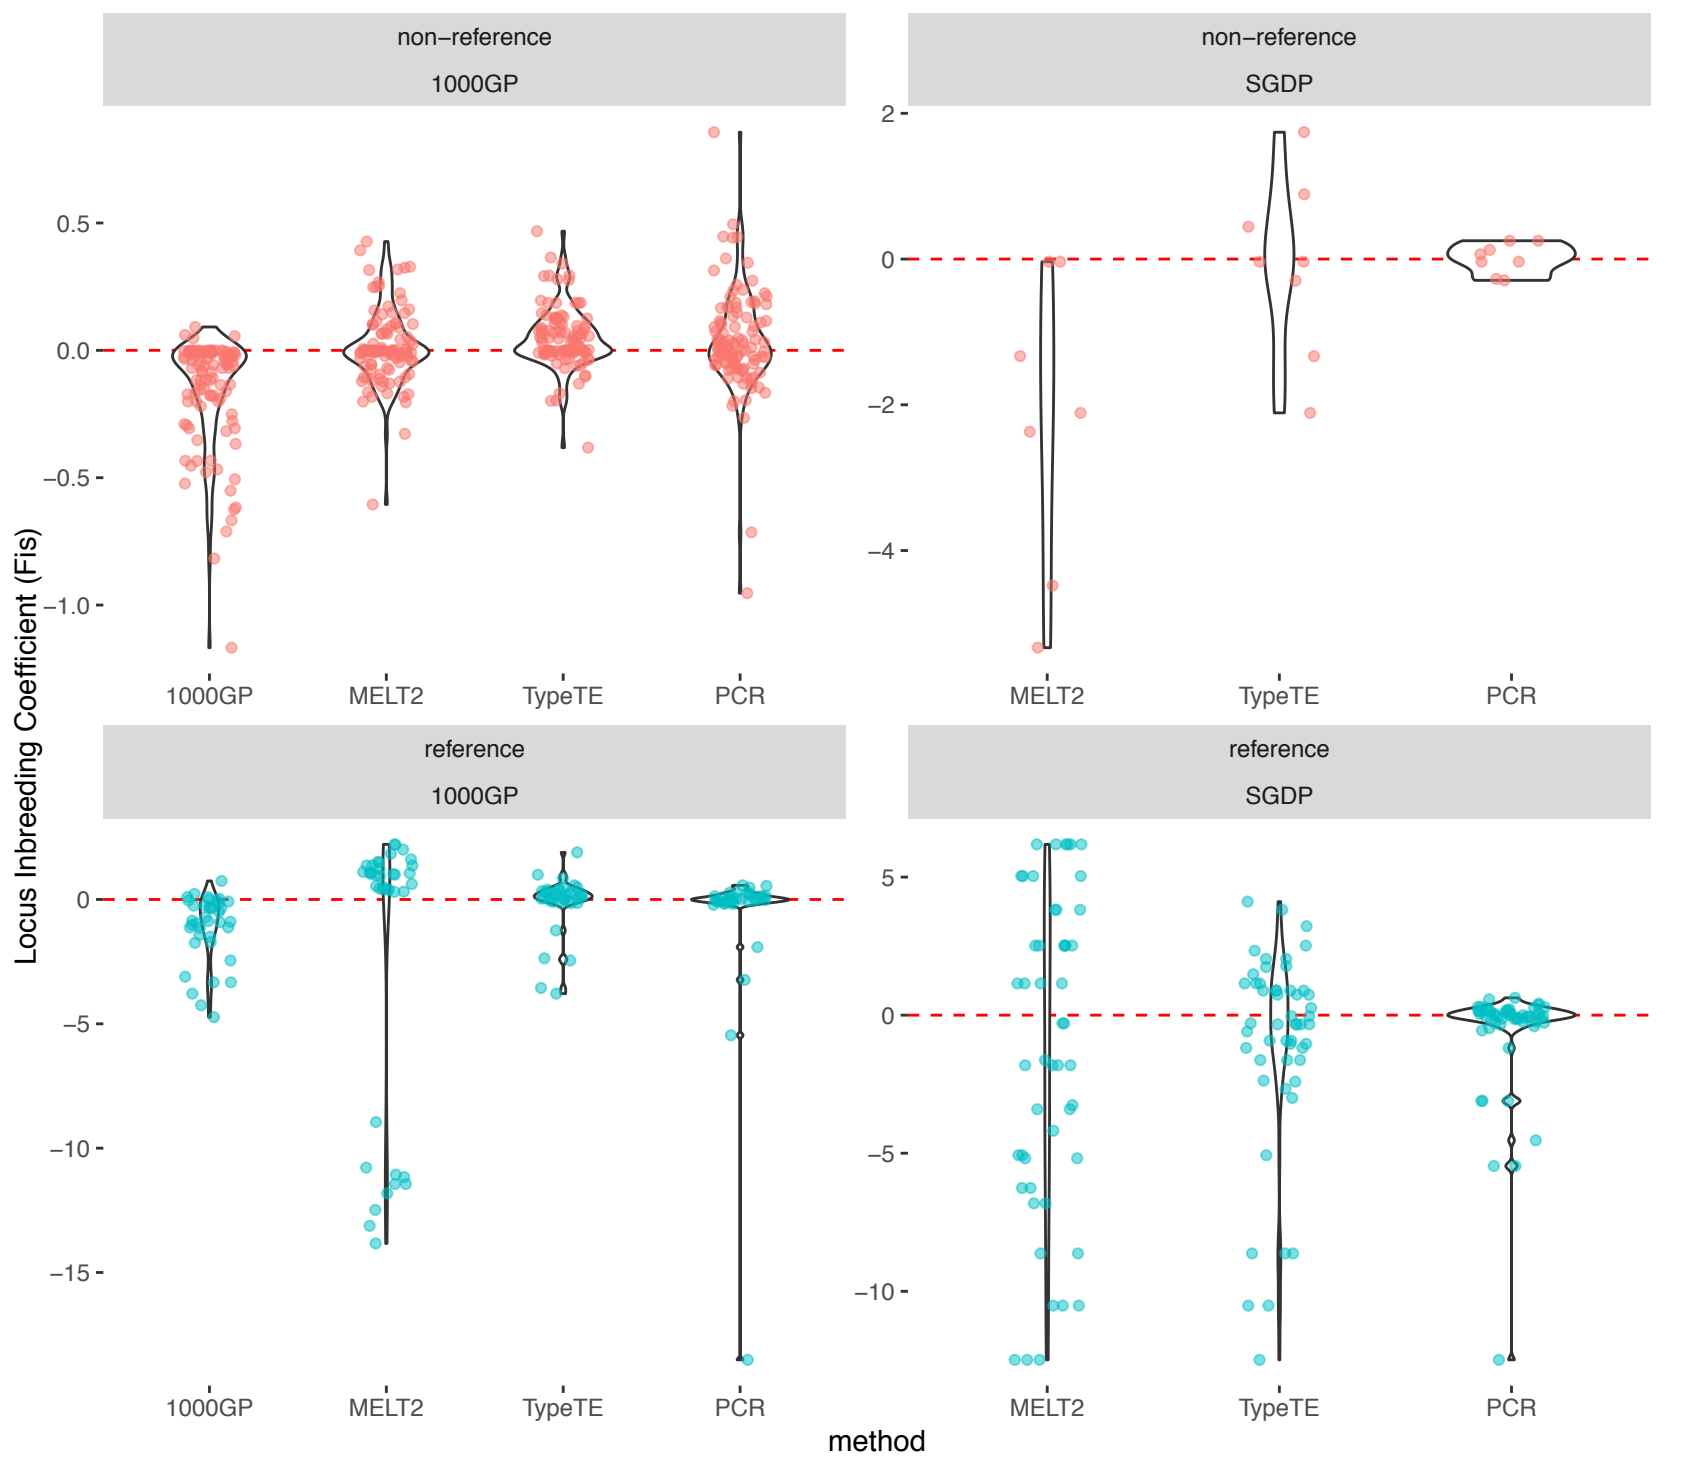

Source: https://www.biorxiv.org/content/10.1101/791665v1.full.pdf
